# Supplementary material
Source: publisher site journal article supplement (https://www.dovepress.com/article/256226)

**Supplementary Figure 1A. Representative images of MBD2 IHC staining of RCC (T) and adjacent normal (N) tissues.**

T1

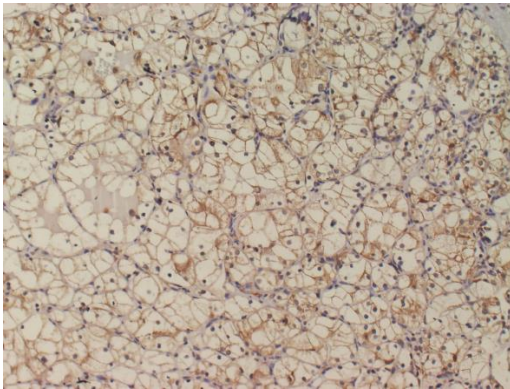

N1

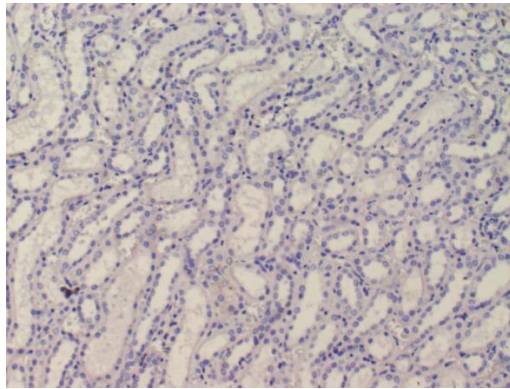

T2

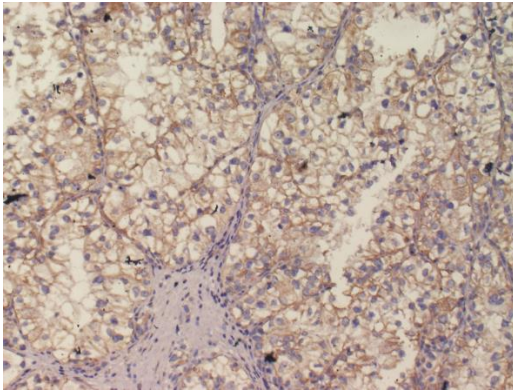

N2

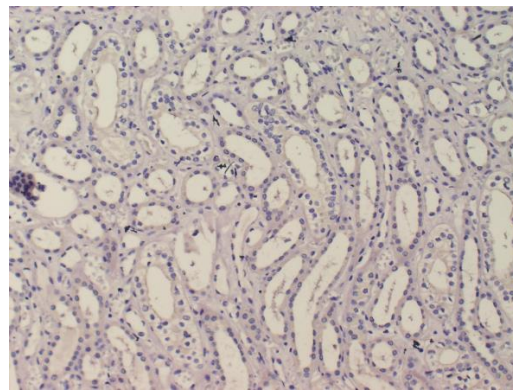

T3

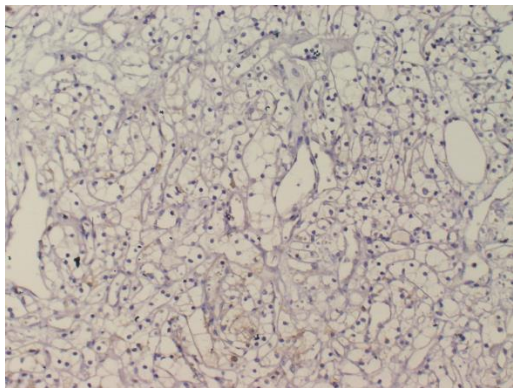

N3

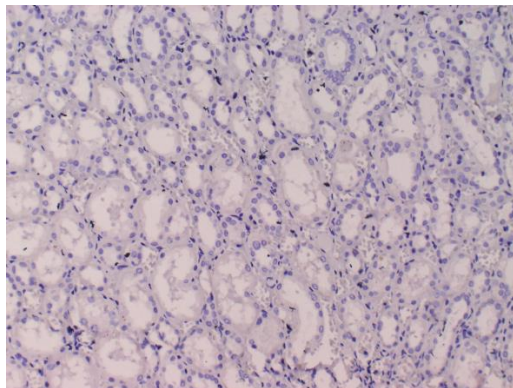

T4

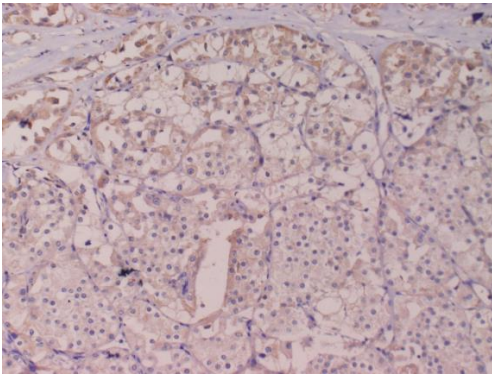

N4

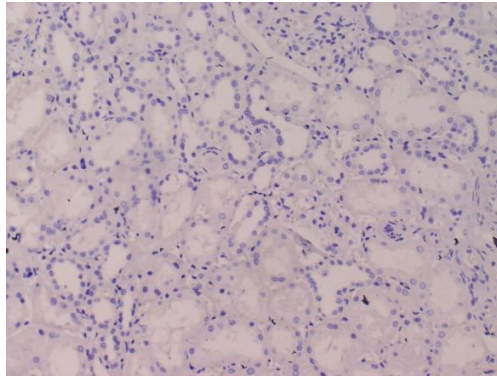

T5

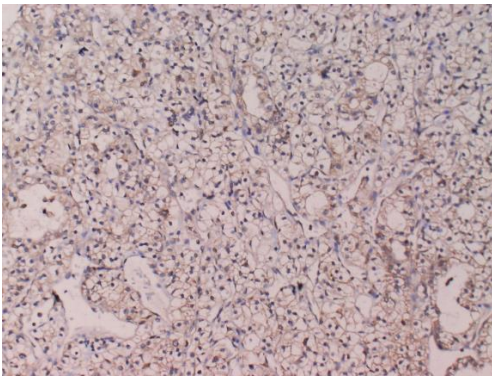

N5

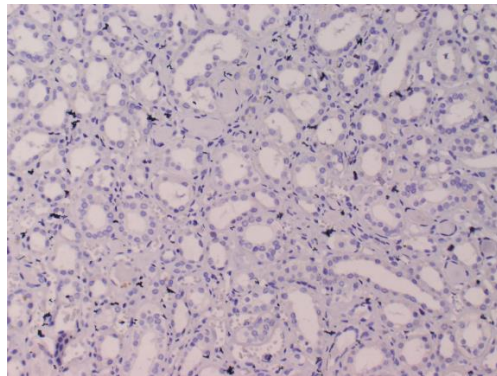

T6

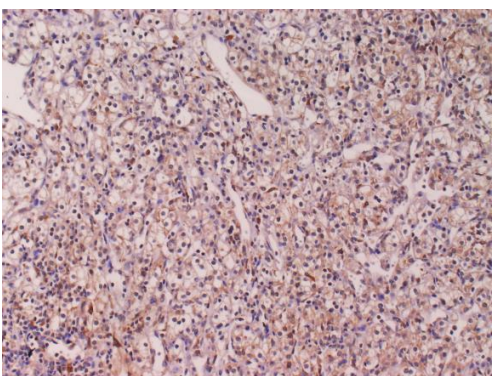

N6

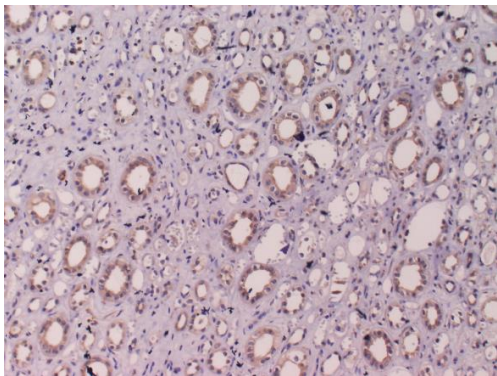

T7

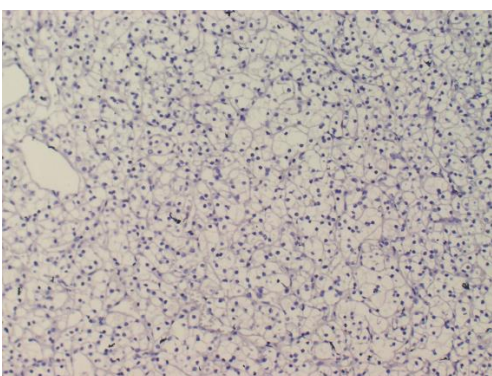

N7

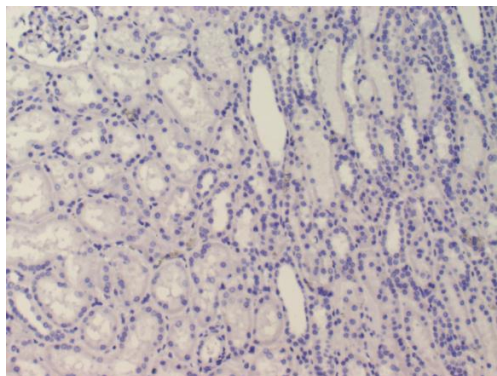

T8

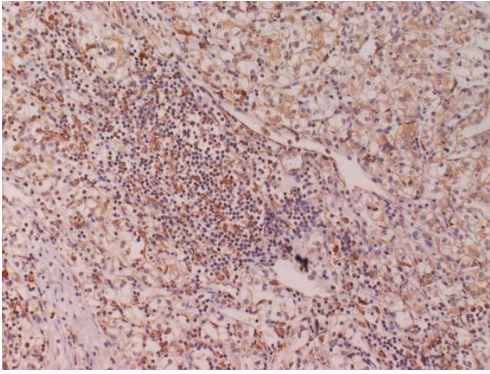

N8

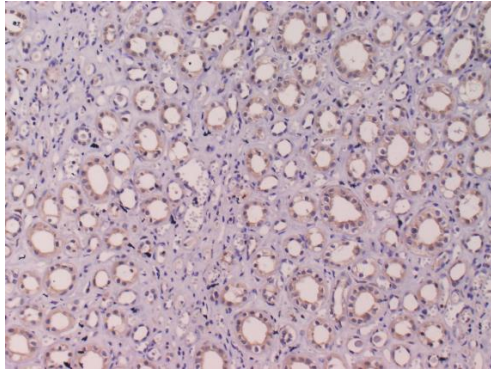

T9

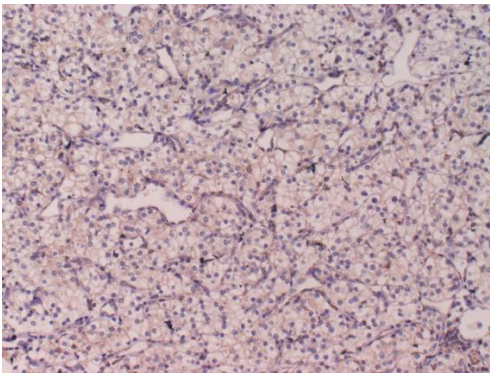

N9

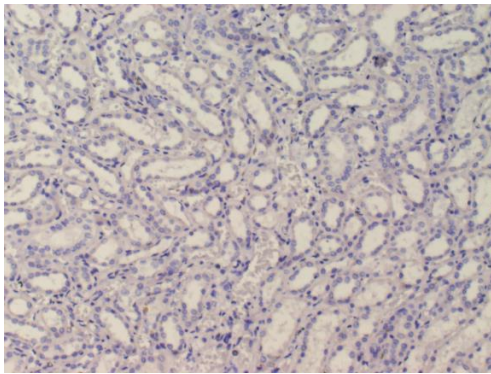

T10

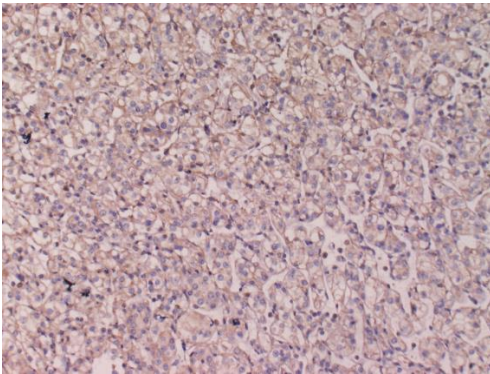

N10

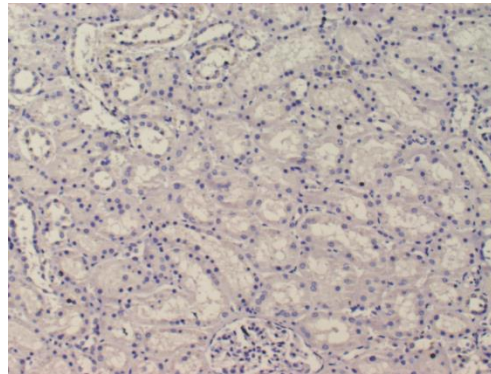

T10

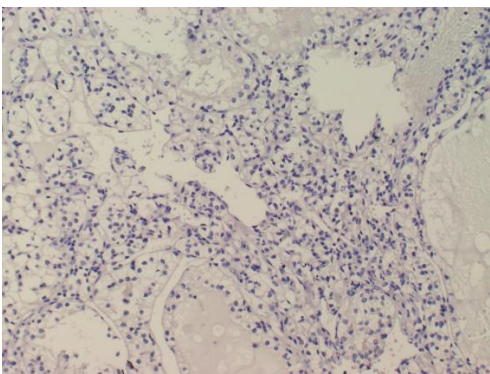

N10

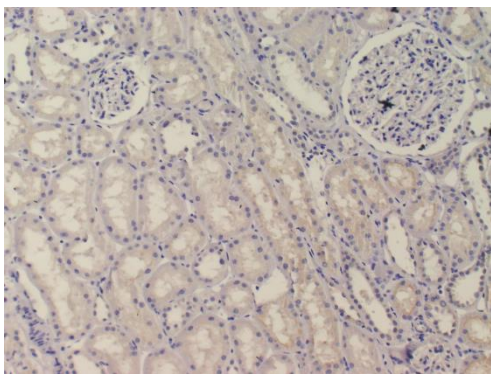

T11

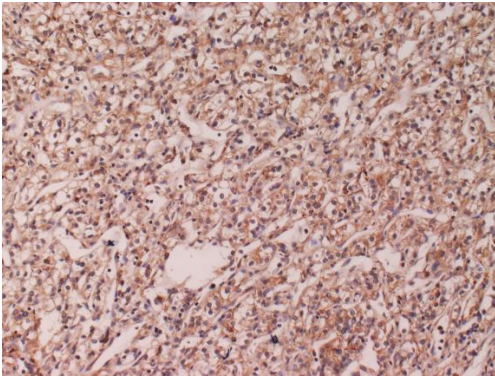

N11

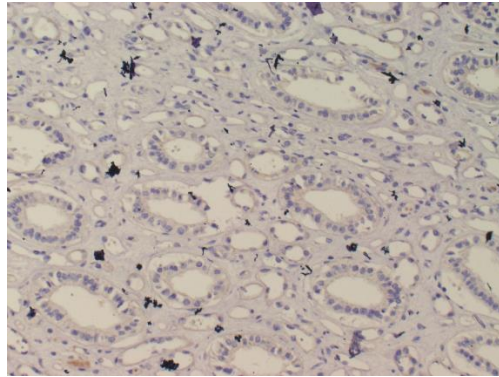

T12

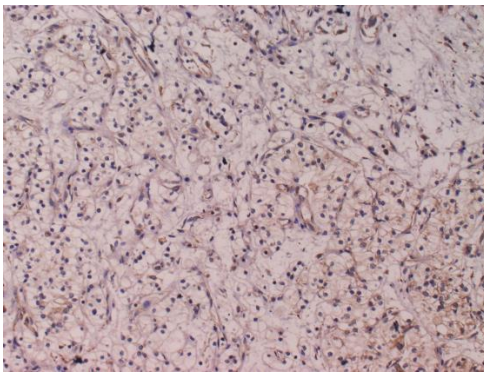

N12

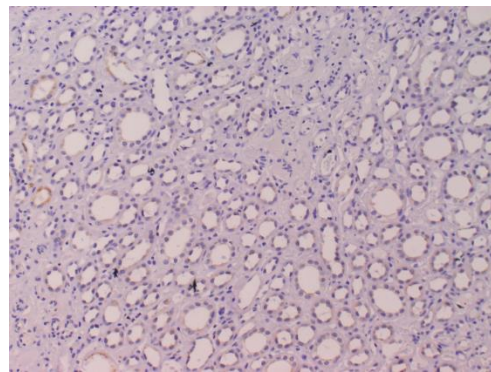

T13

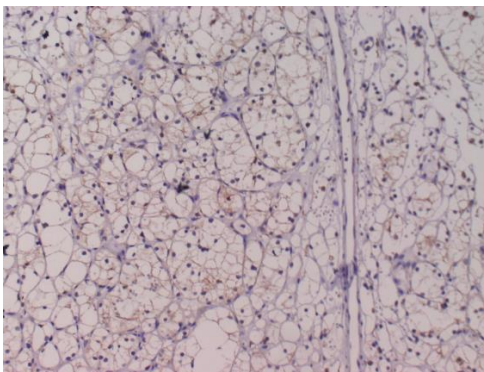

N13

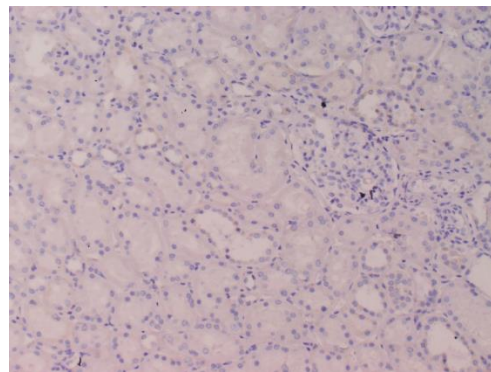

T14

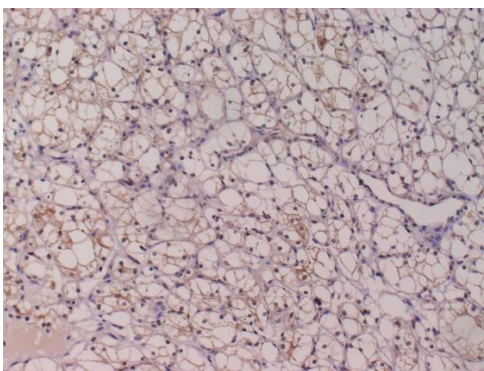

N14

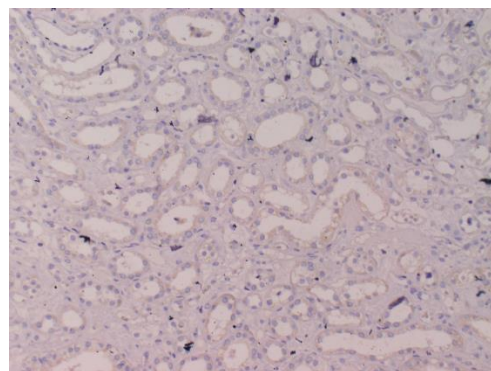

T15

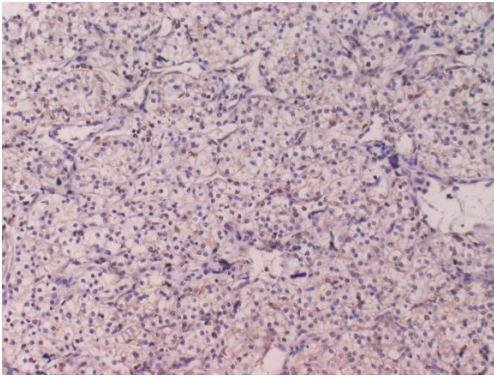

N15

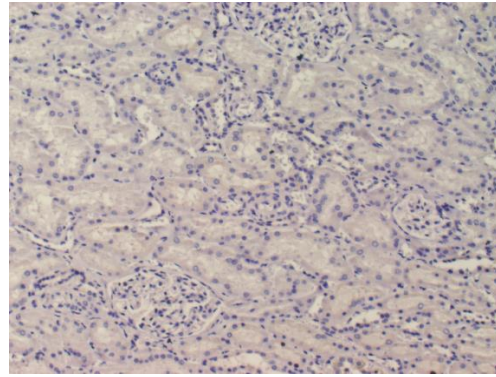

T16

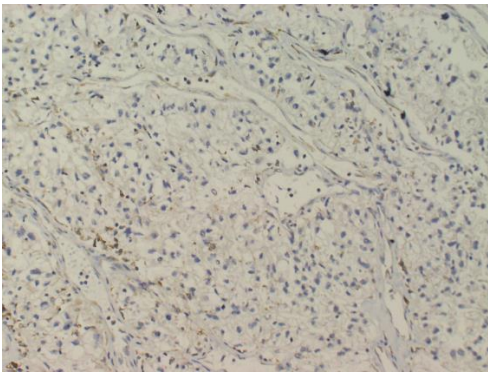

N16

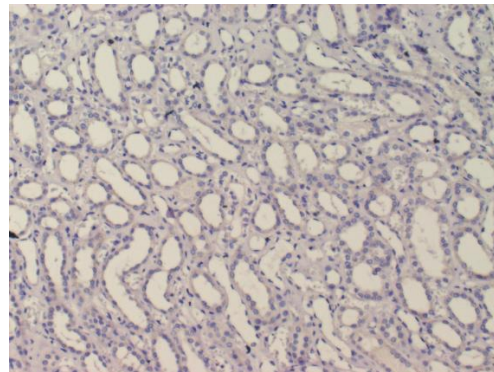

T17

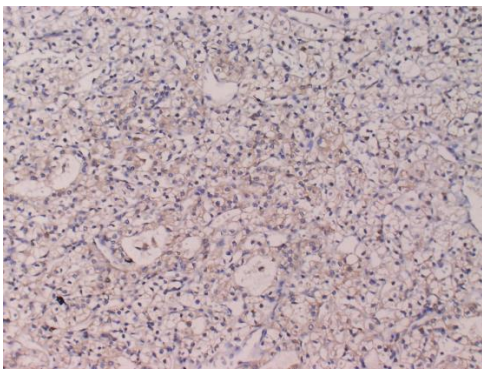

N17

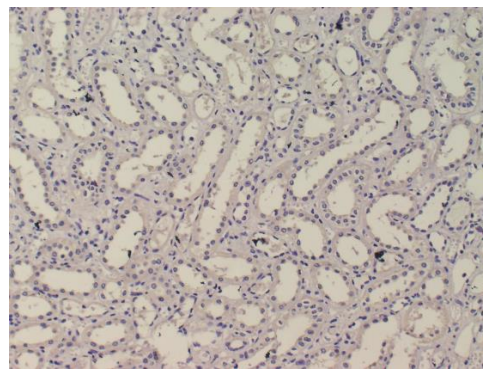

T18

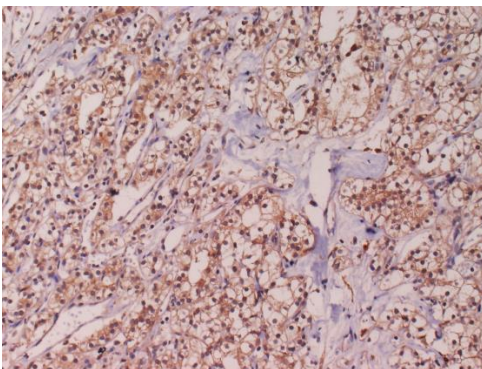

N18

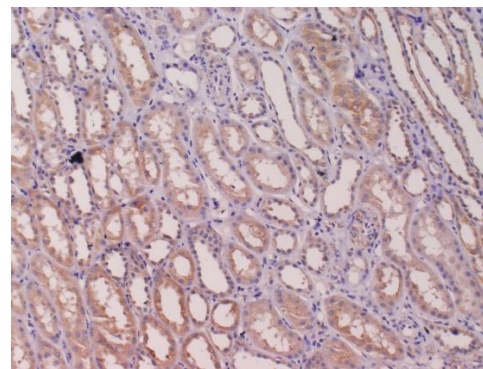

T19

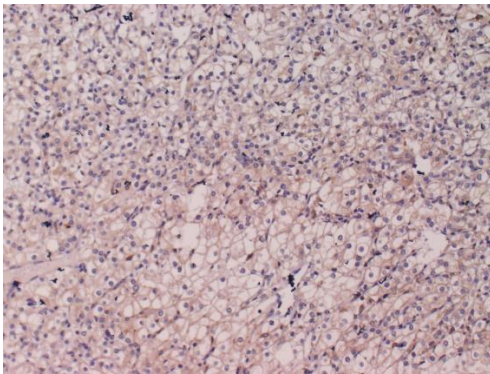

N19

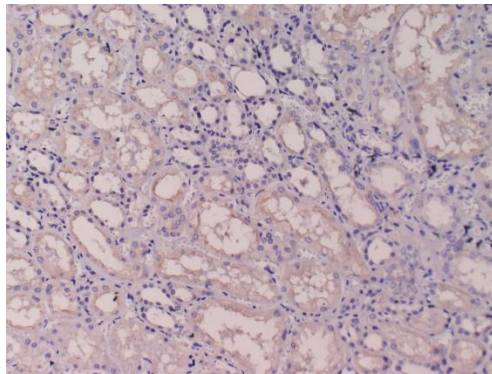

T20

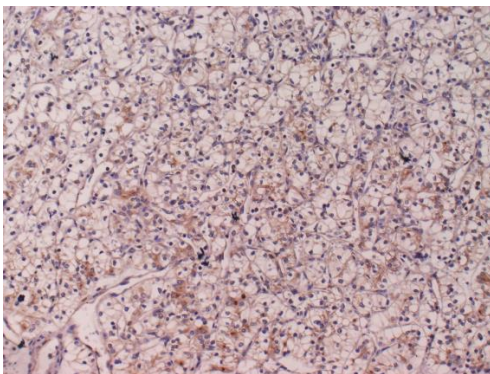

N20

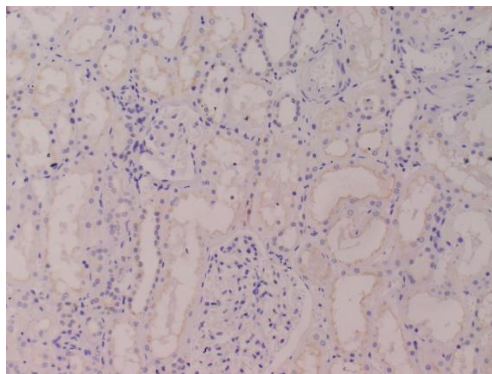

T21

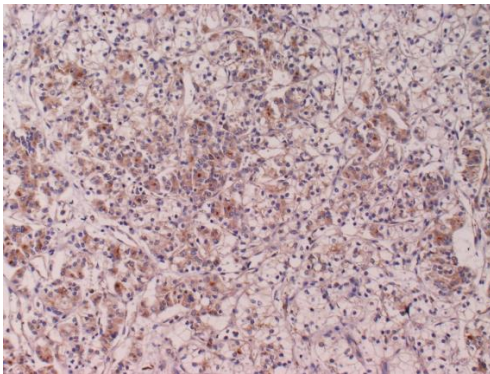

N21

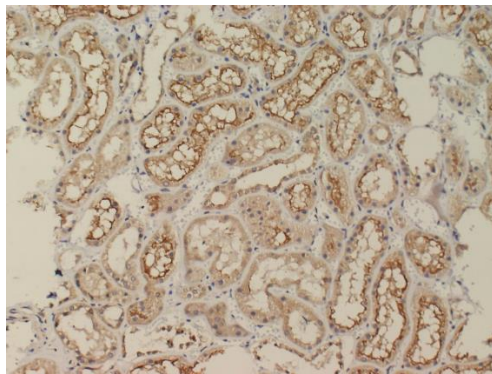

T22

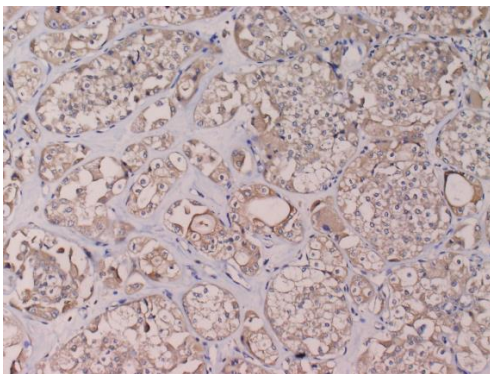

N22

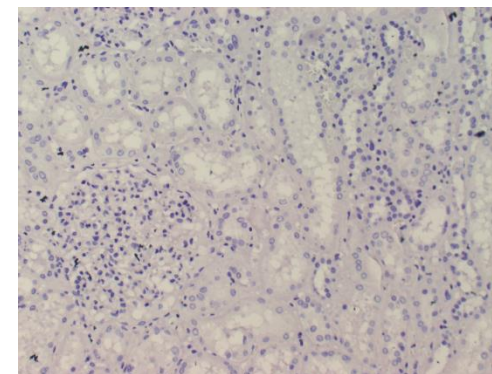

T23

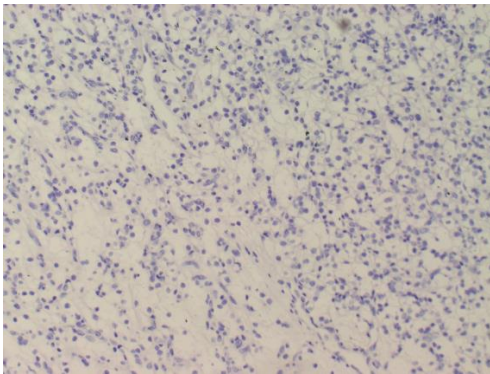

N23

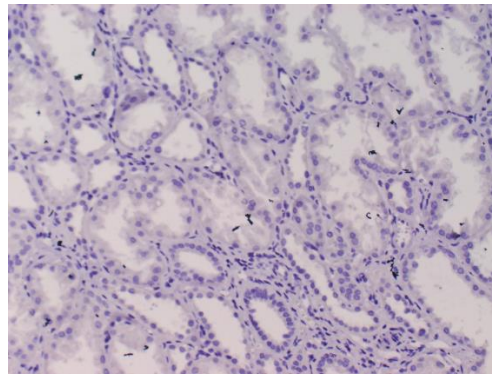

T24

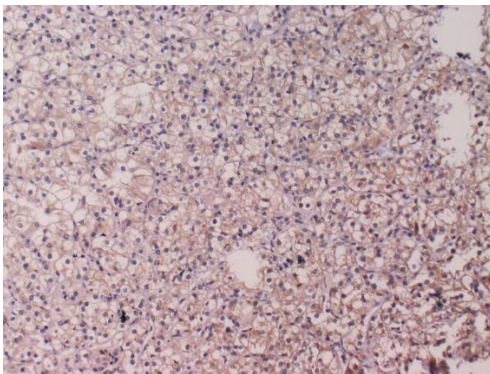

N24

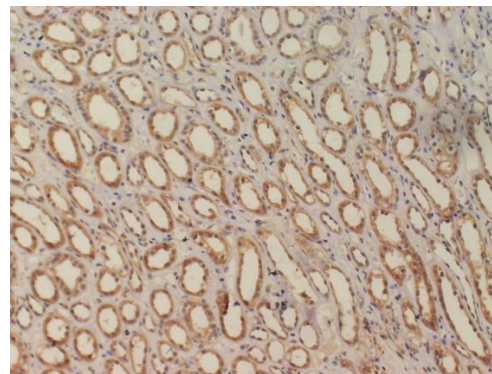

T25

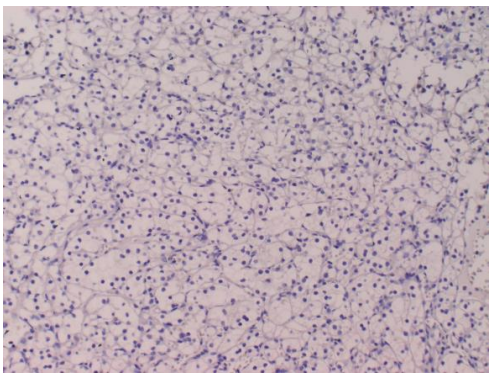

N25

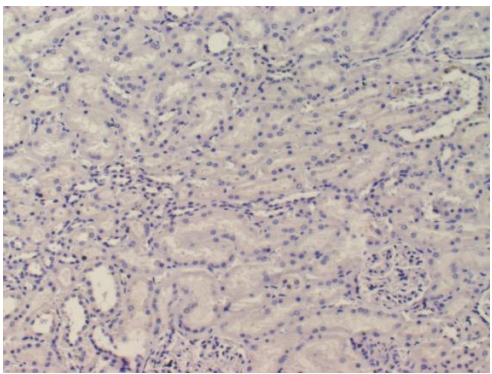

T26

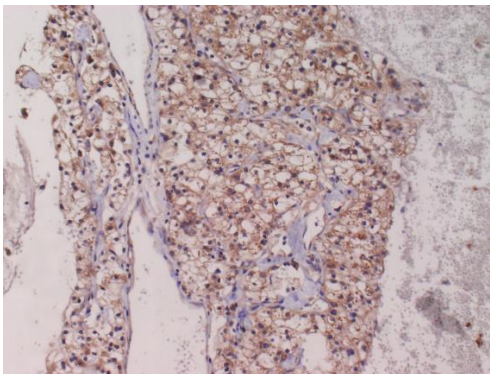

N26

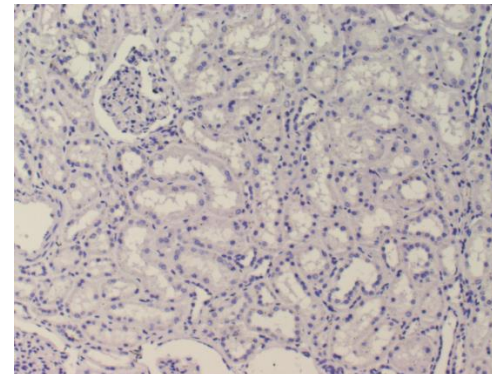

T27

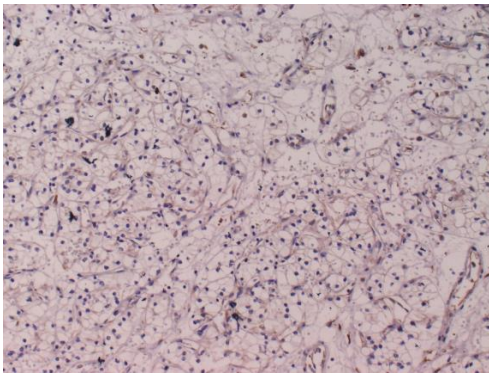

N27

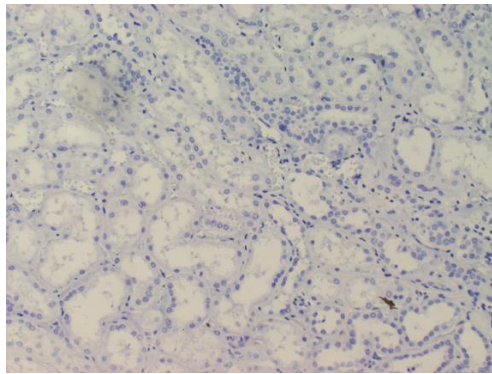

T28

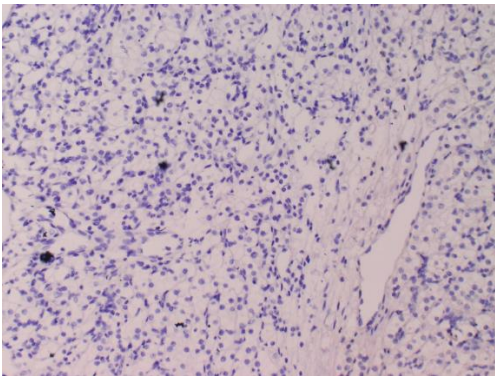

N28

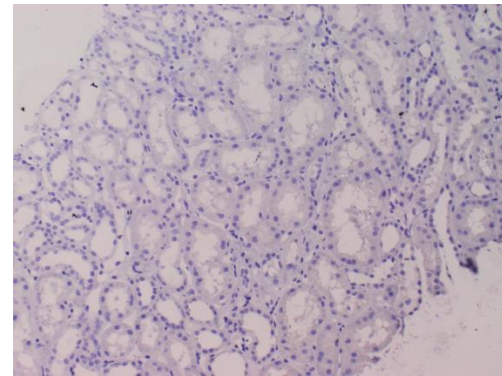

T29

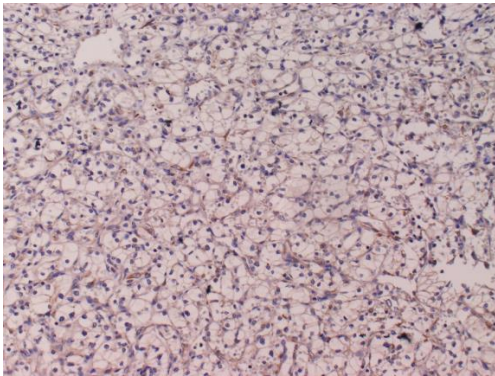

N29

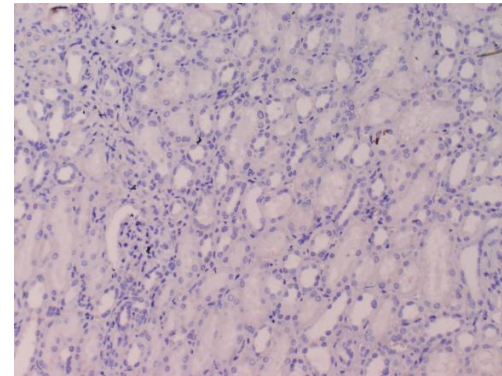

T30

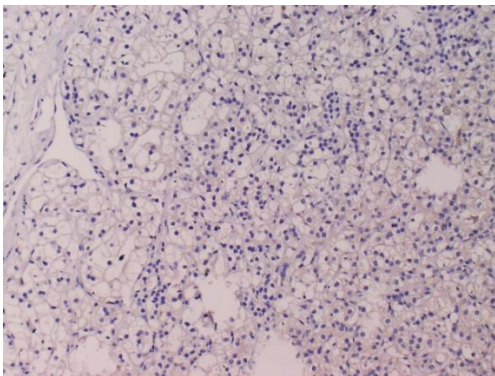

N30

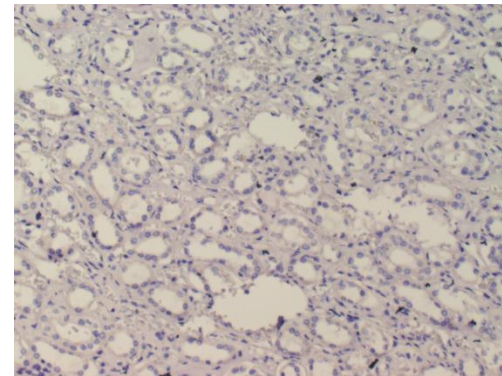



T31

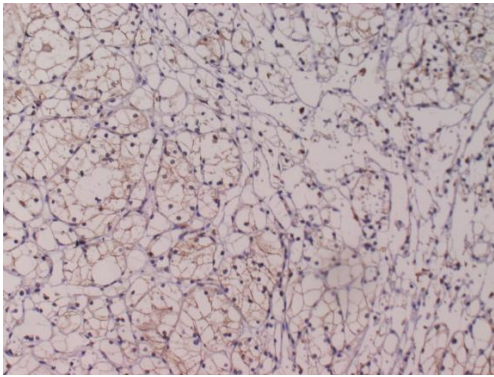

N31

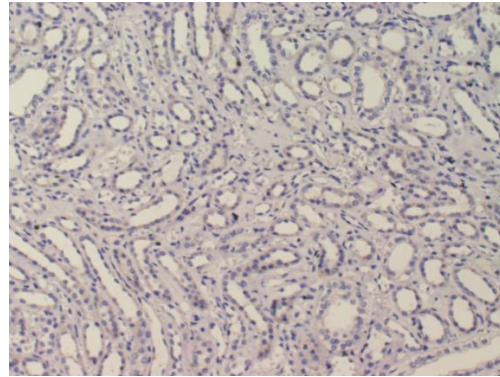

T32

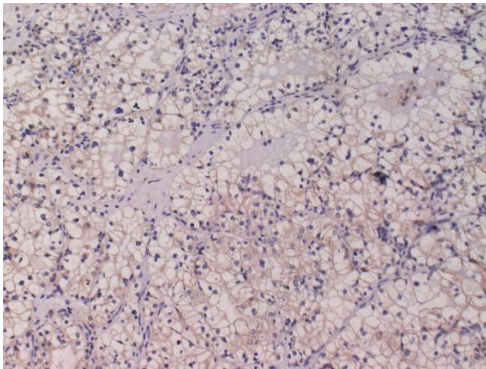

N32

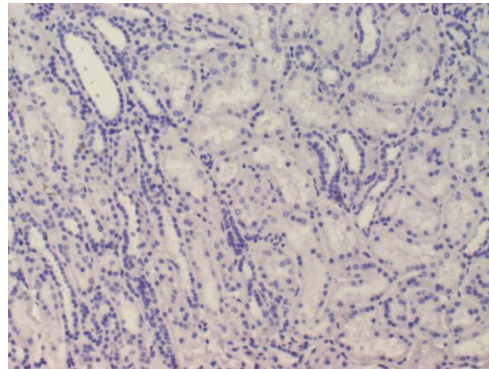

T33

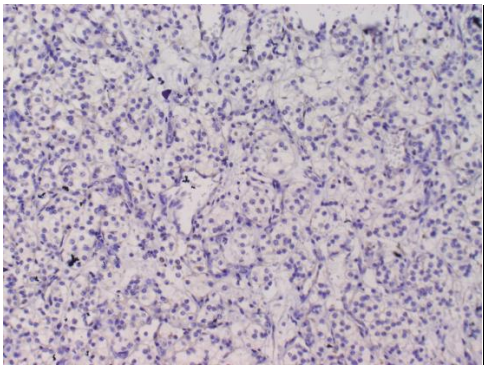

N33

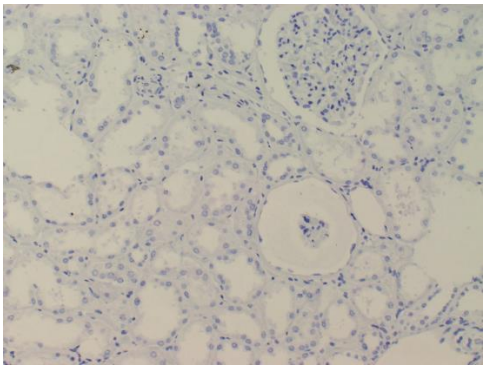

T34

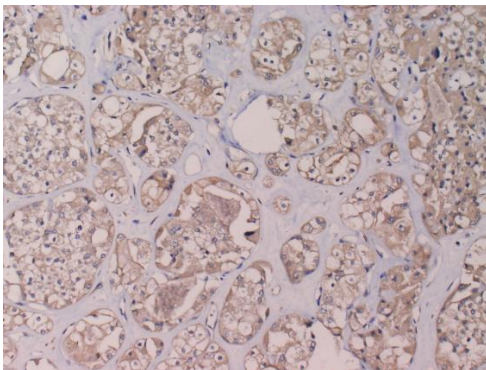

N34

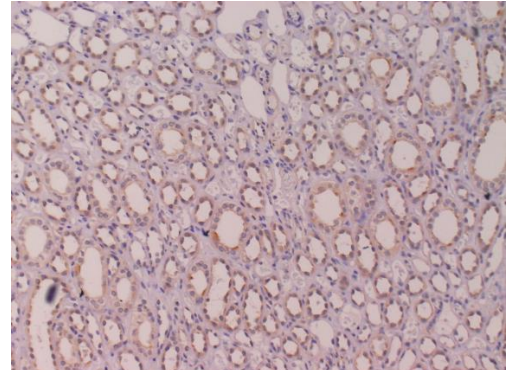

T35

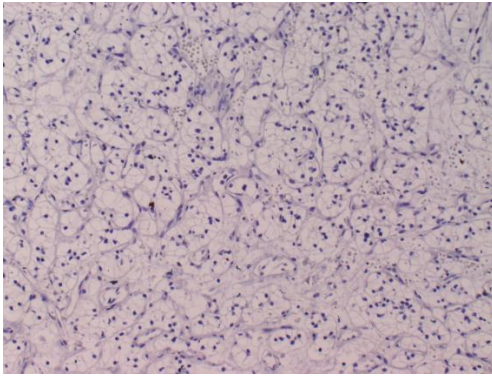

N35

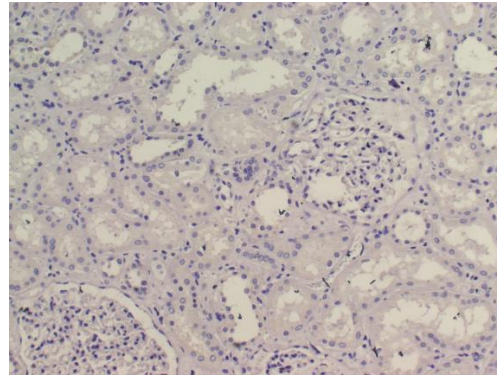

T36

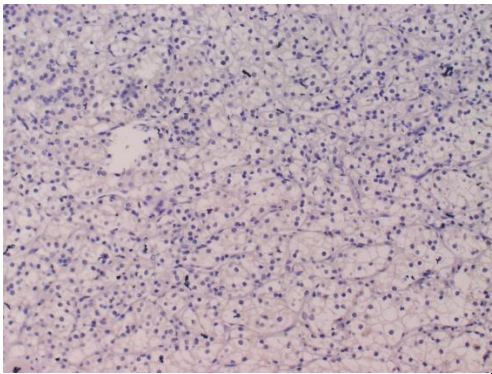

N36

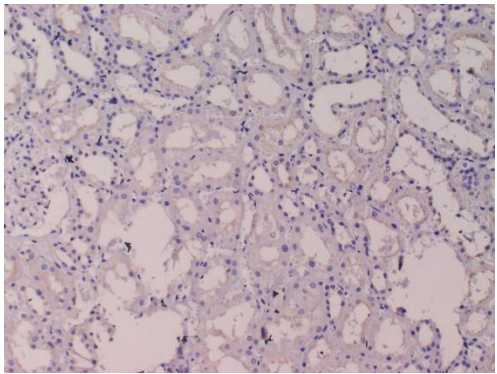

T37

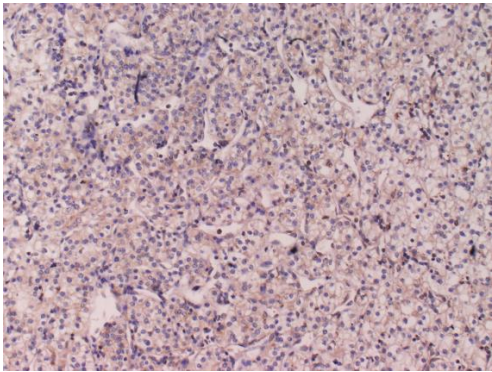

N37

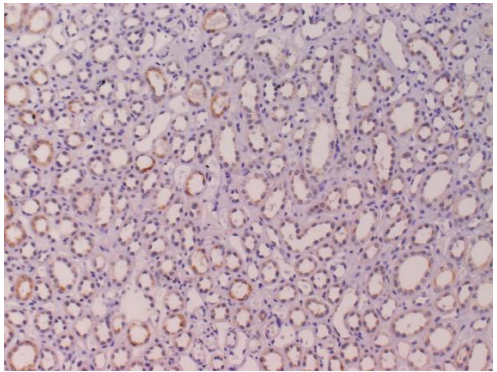

T38

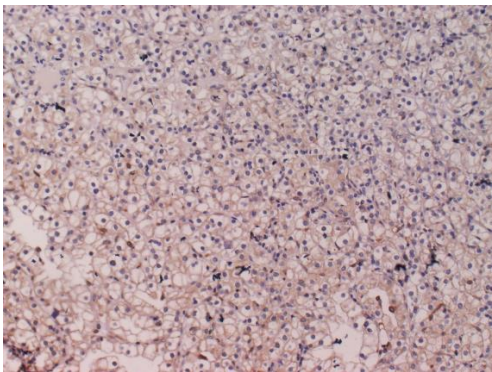

N38

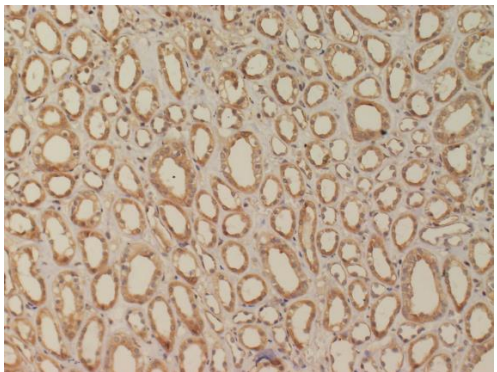

T39

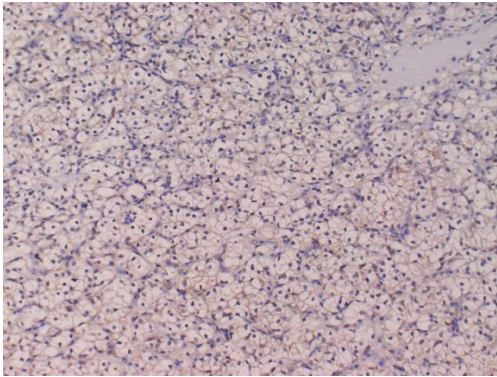

N39

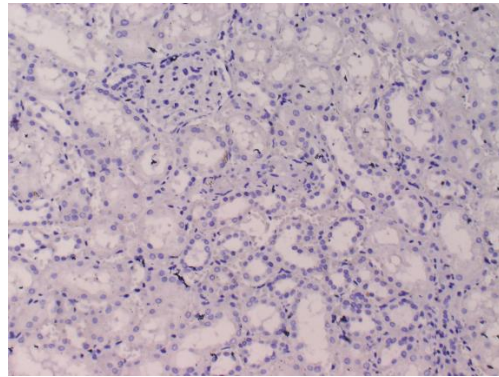

T40

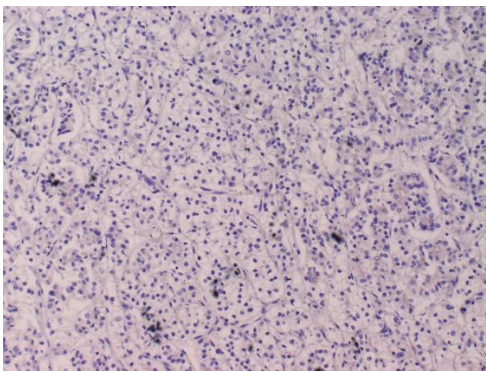

N40

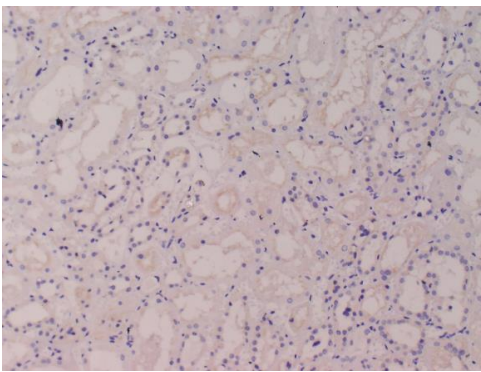

T41

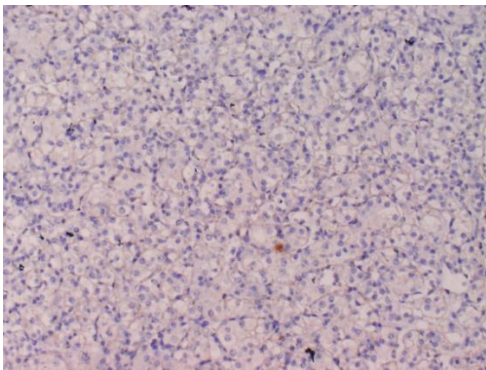

N41

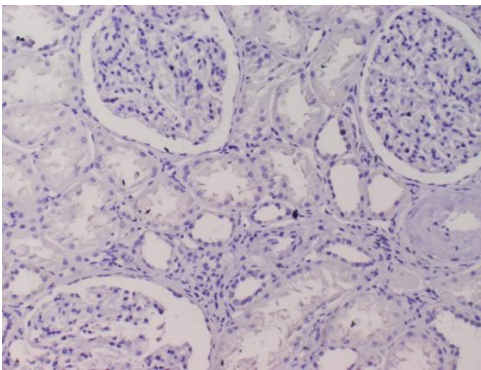

T42

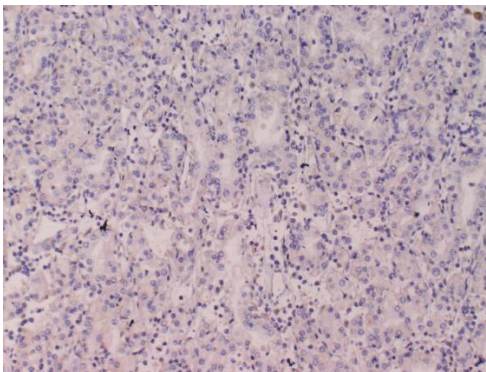

N42

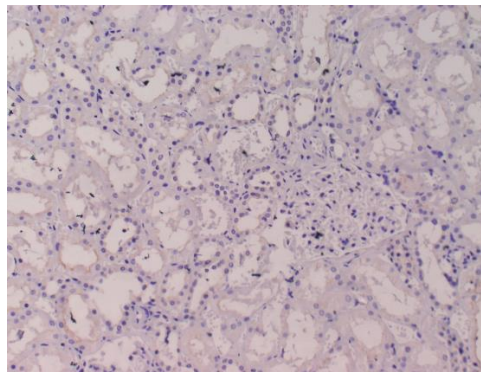

T43

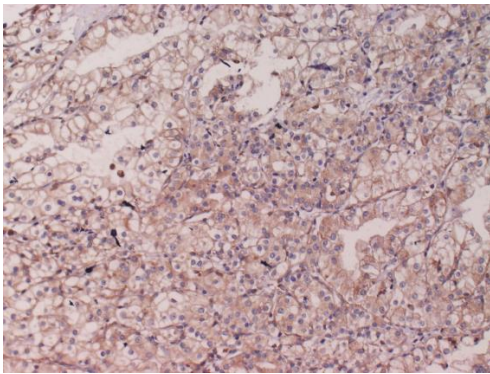

N43

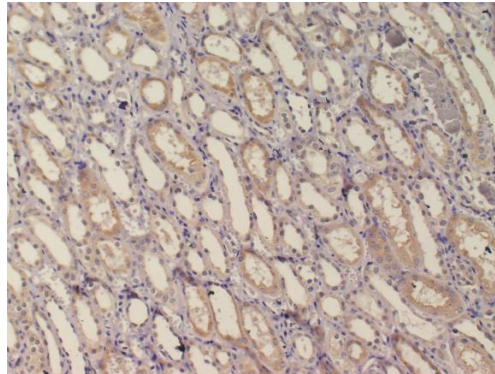

T44

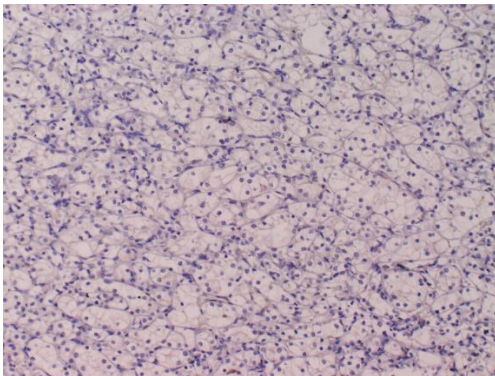

N44

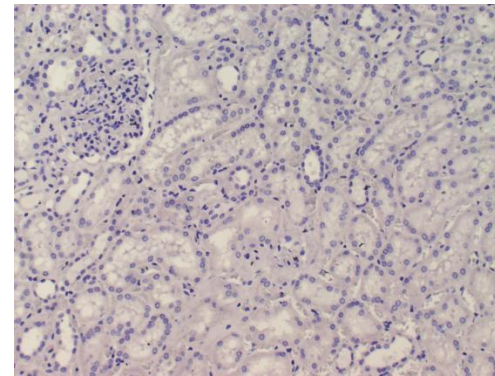

T45

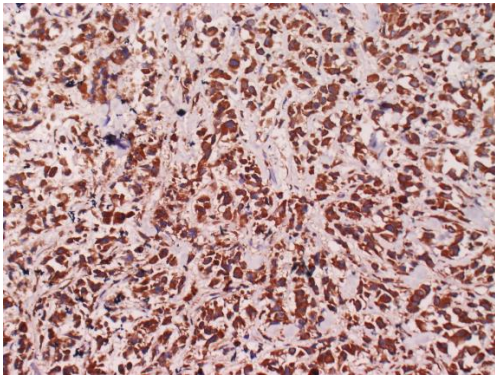

N45

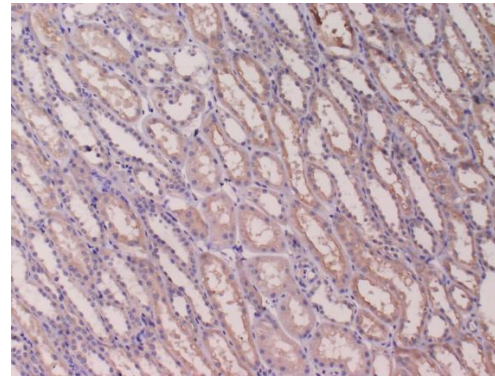

T46

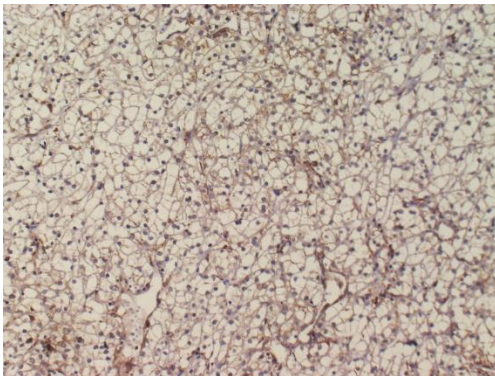

N46

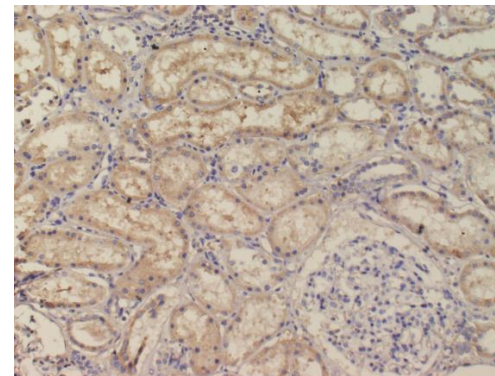

T47

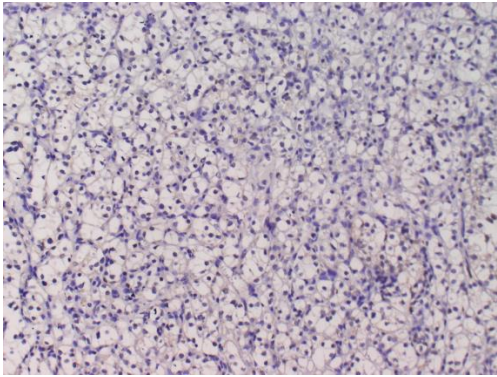

N47

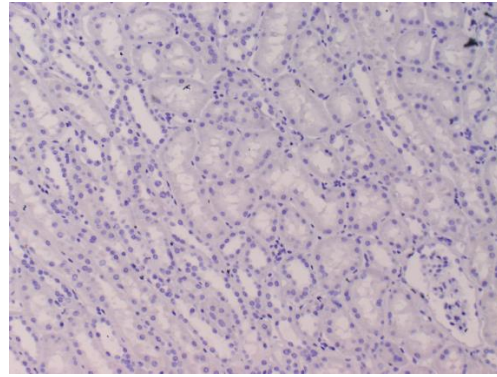

T48

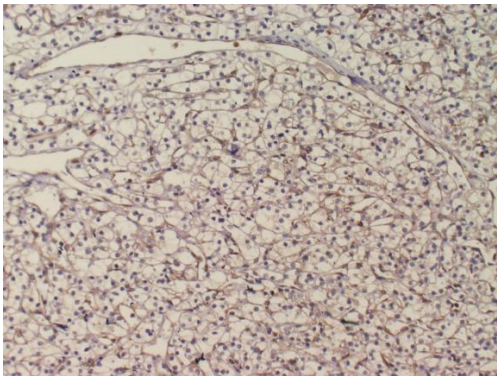

N48

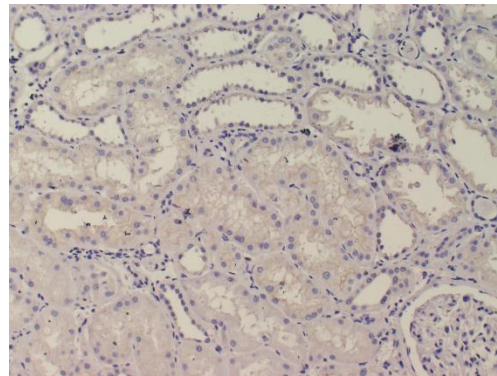

T49

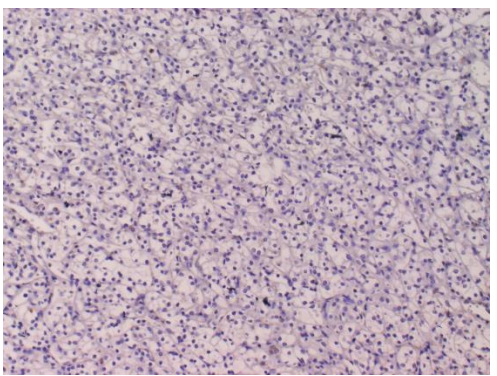

N49

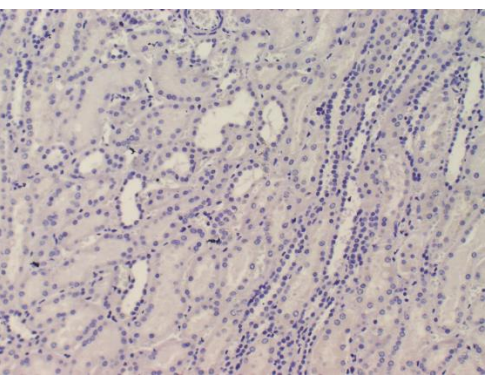

T50

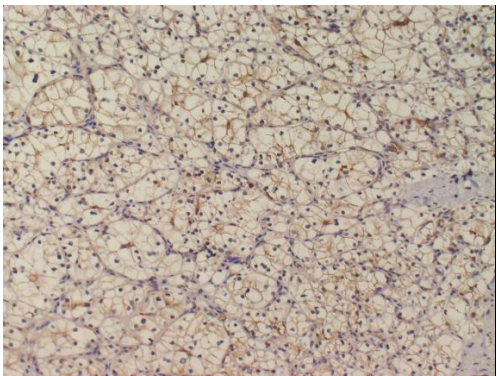

N50

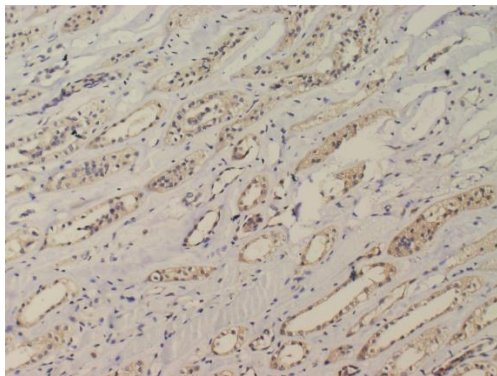

T51

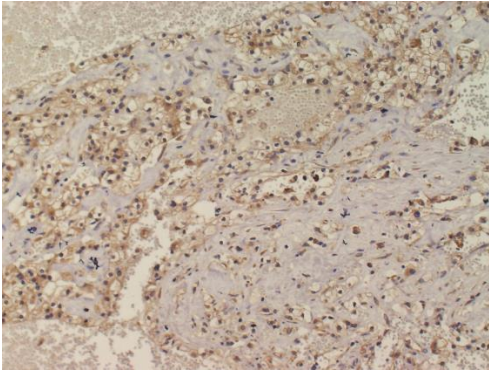

N51

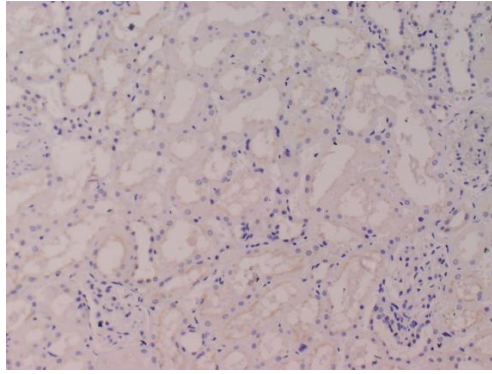

T52

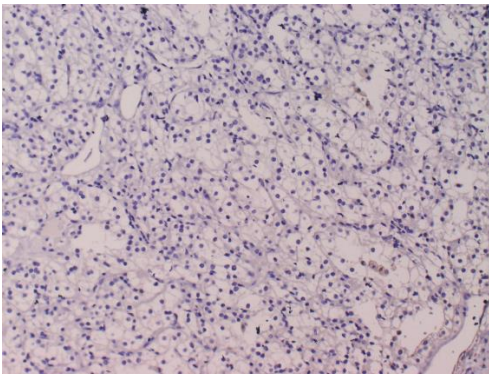

N52

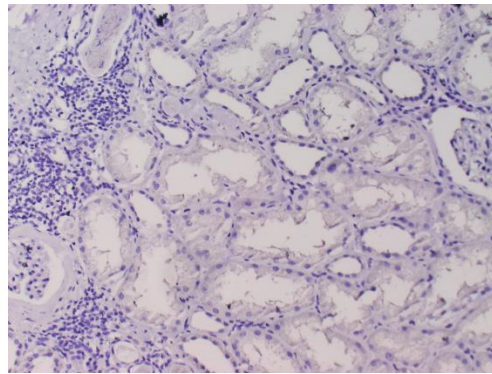

T53

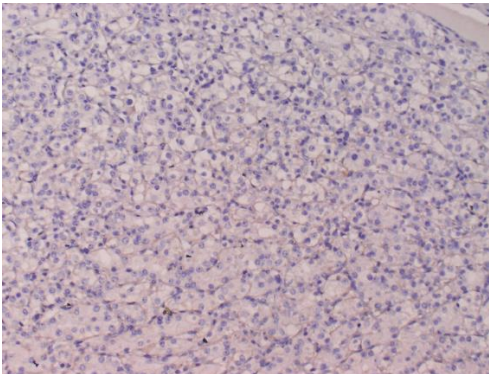

N53

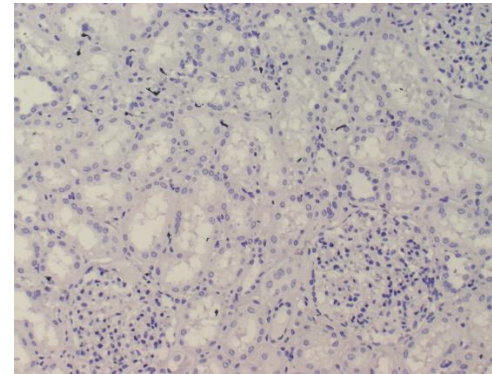

T54

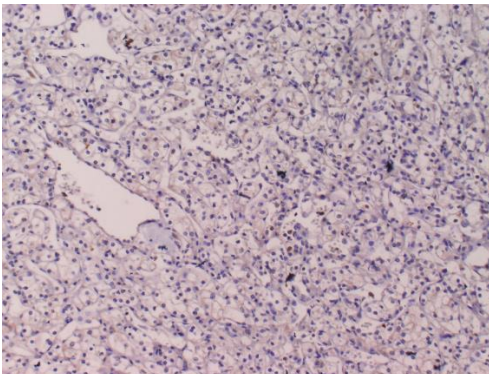

N54

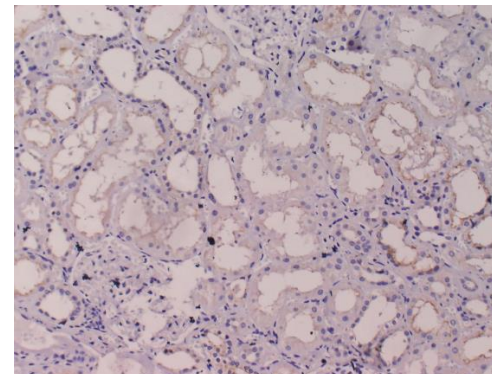

T55

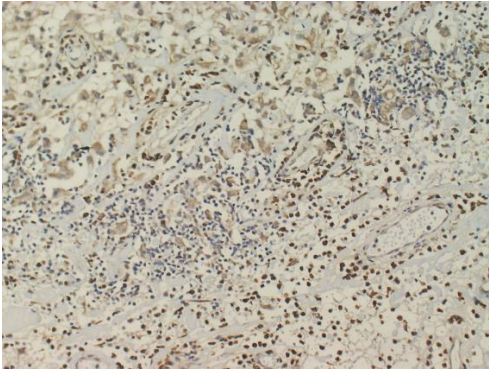

N55

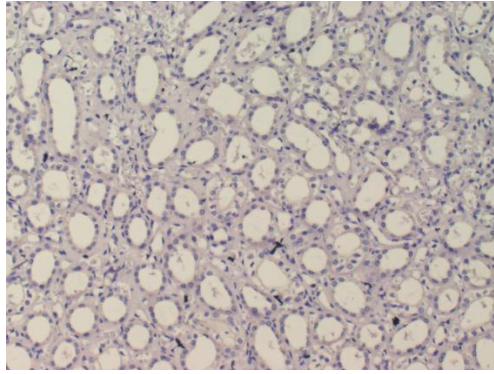

T56

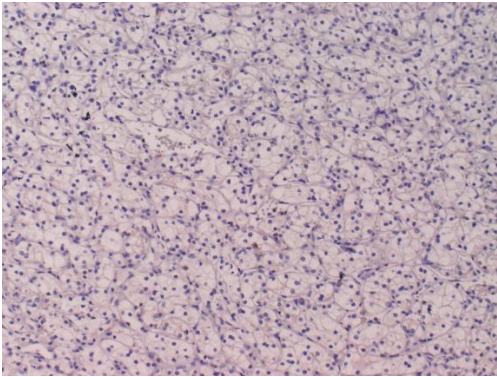

N56

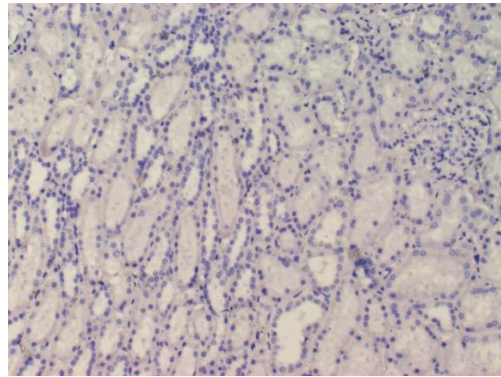

T57

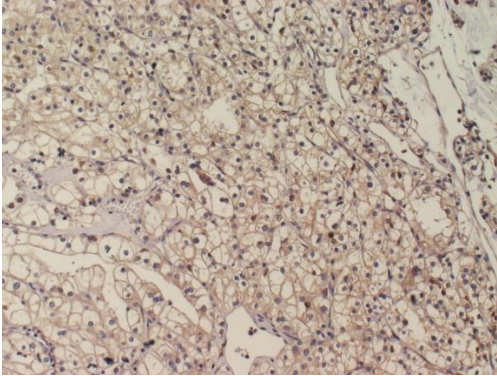

N57

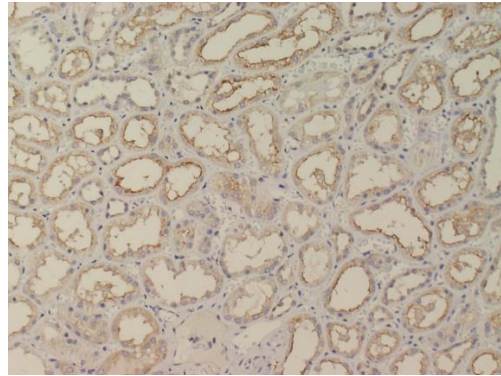

T58

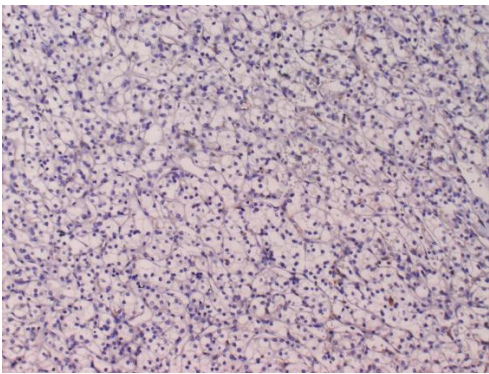

N58

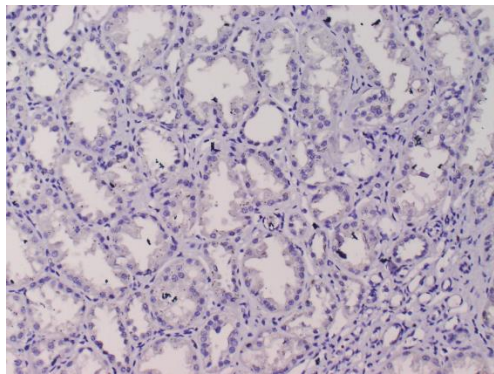

T59

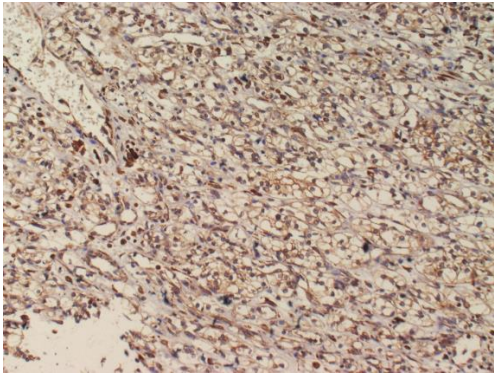

N59

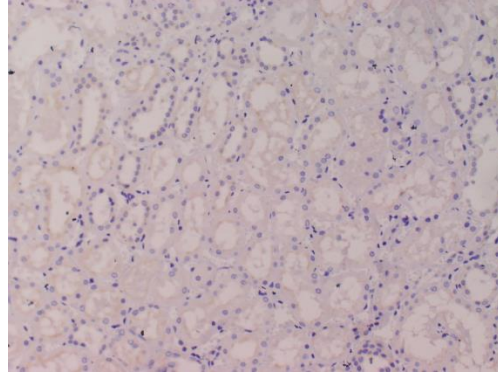

T60

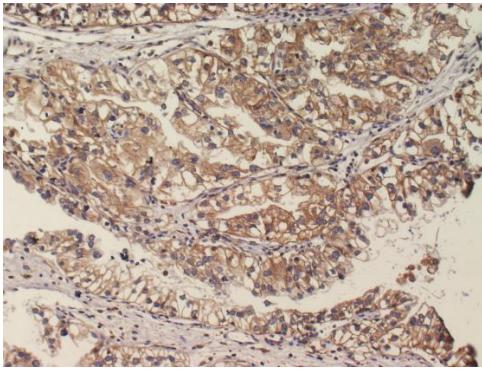

N60

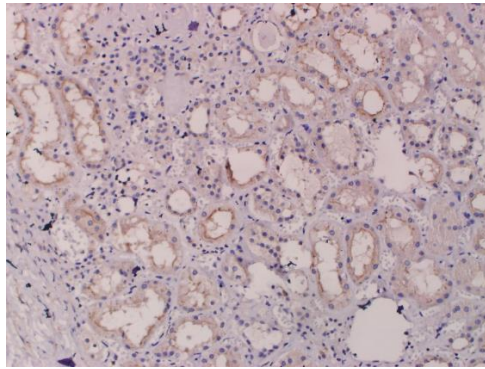

T61

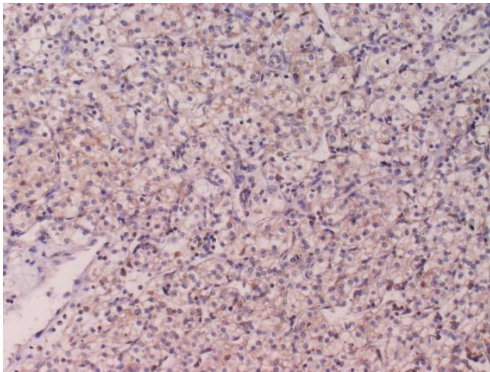

N61

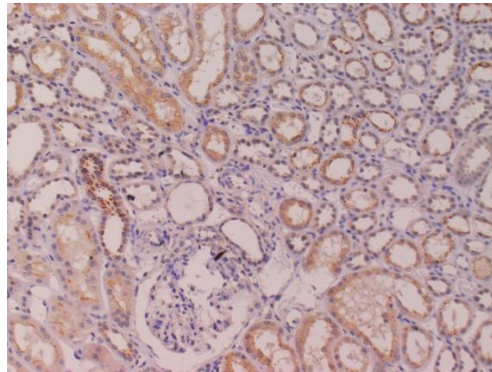

T62

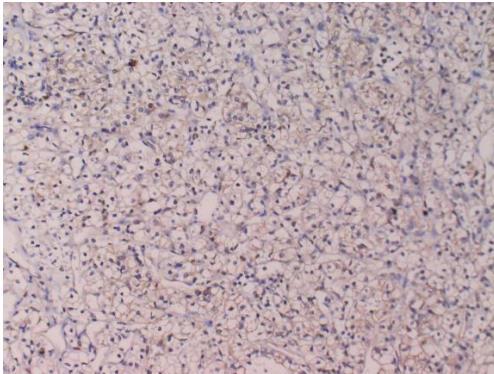

N62

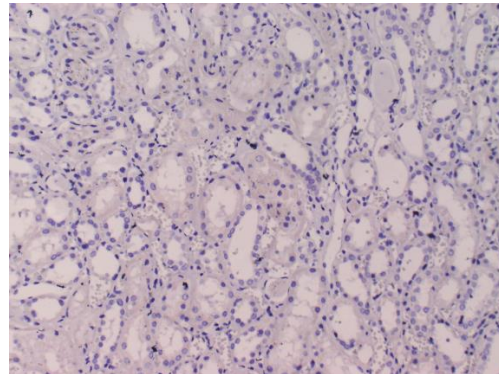



T63

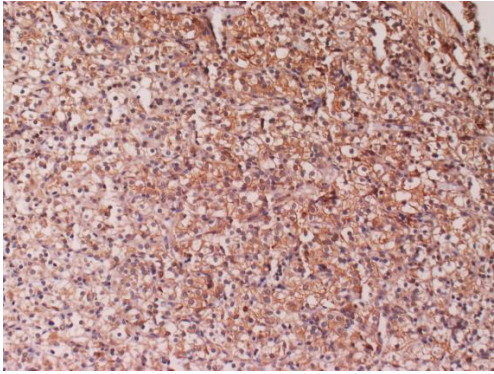

N63

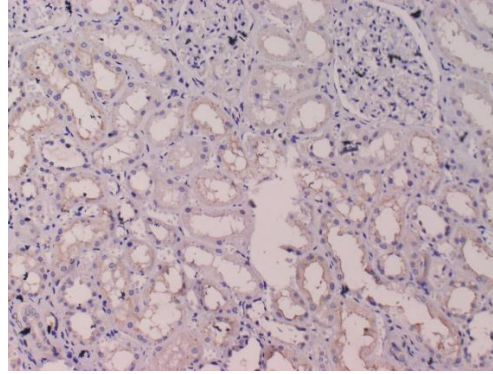

T64

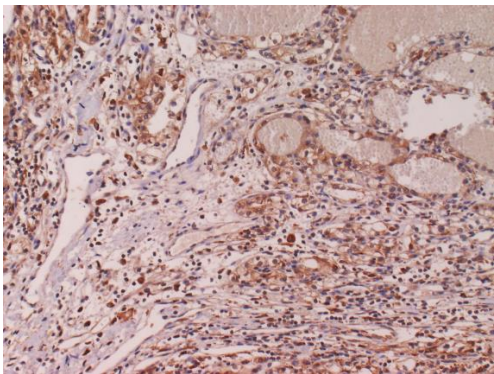

N64

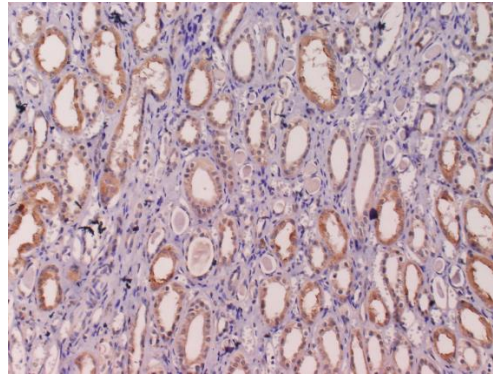

T65

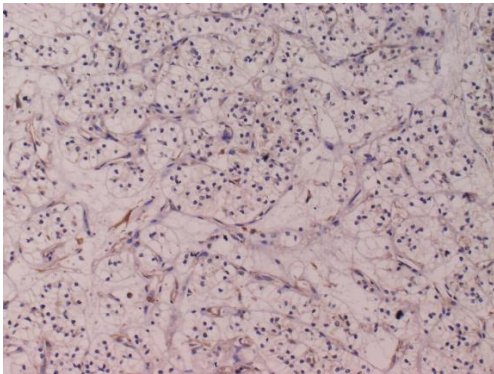

N65

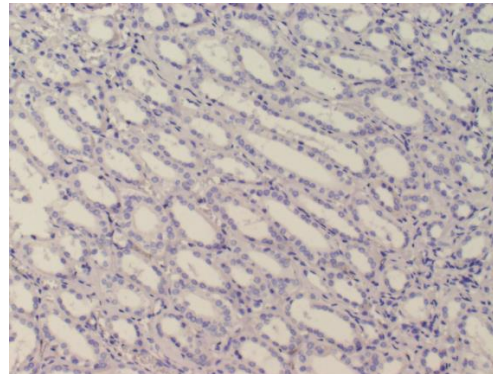

T66

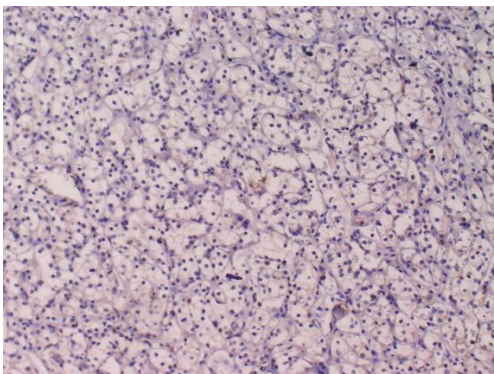

N66

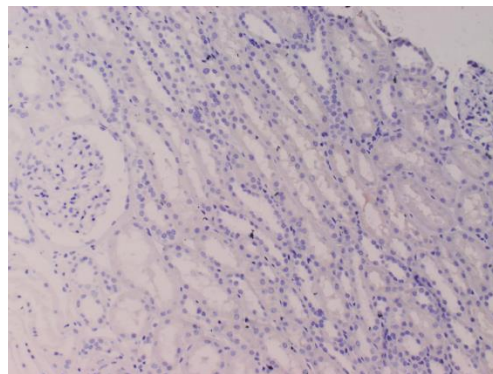

T67

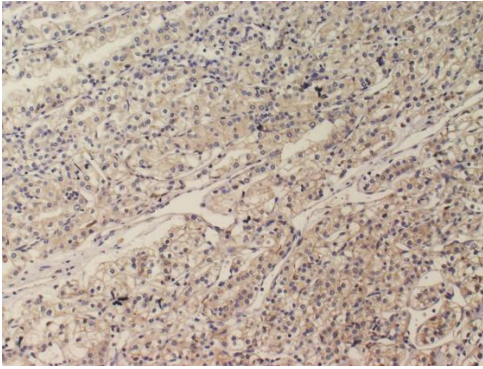

N67

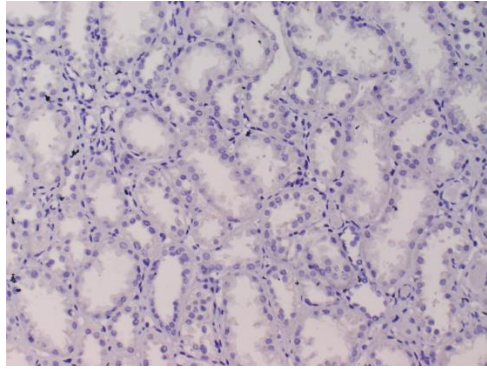

T68

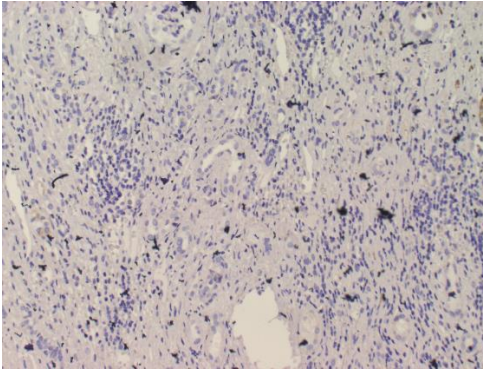

N68

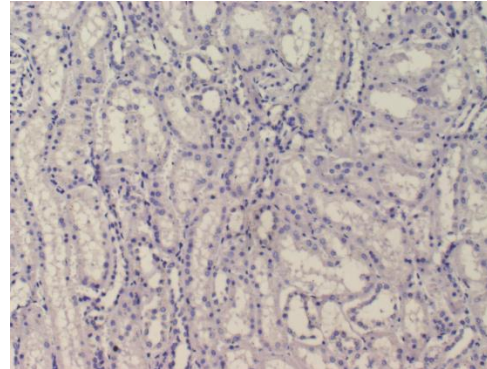

T69

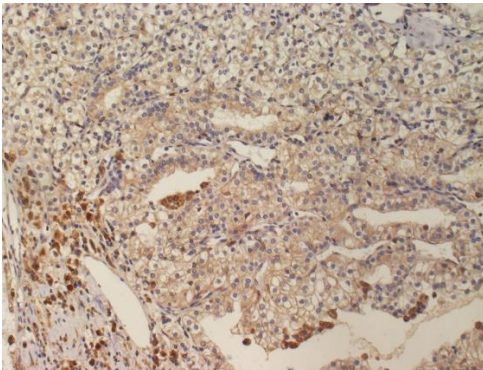

N69

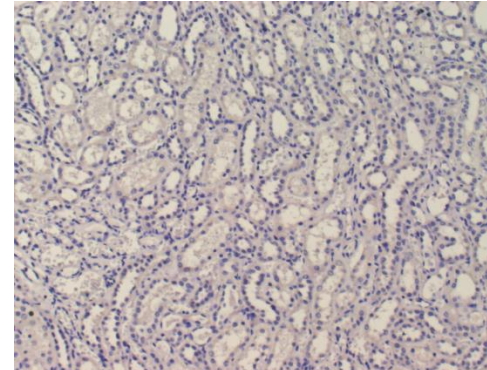

T70

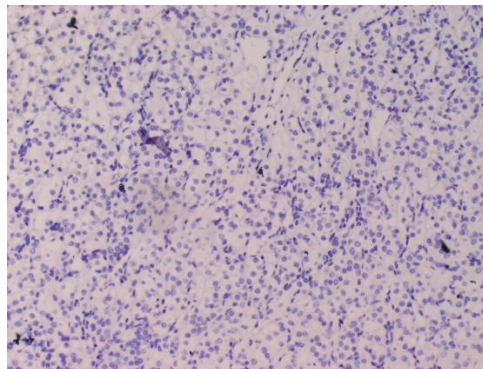

N70

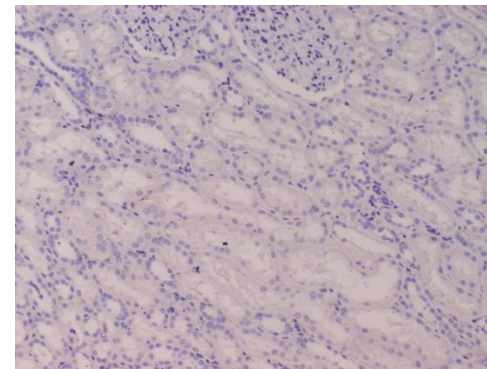

T71

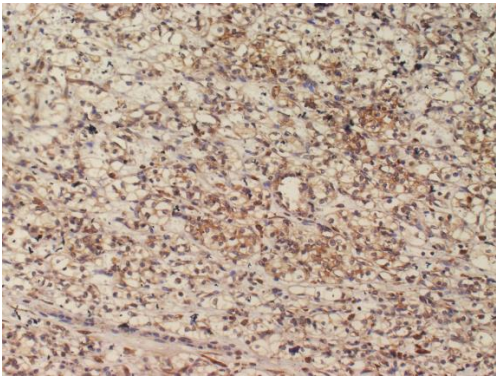

N71

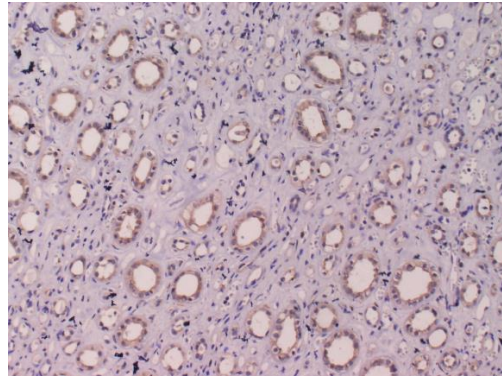

T72

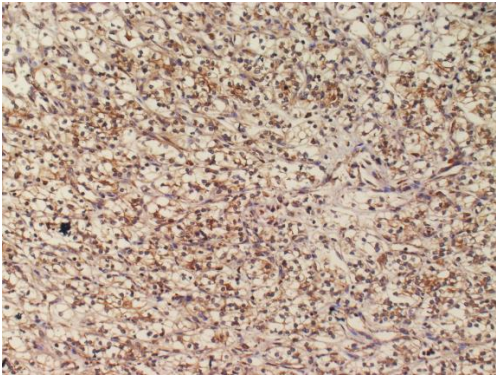

N72

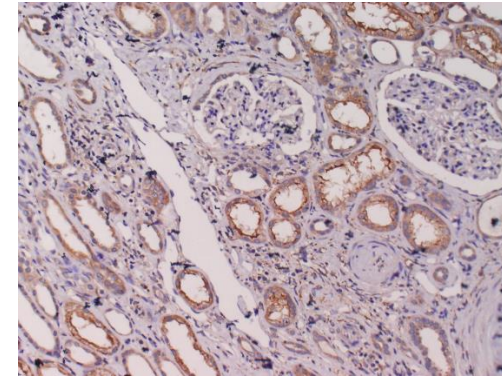

T73

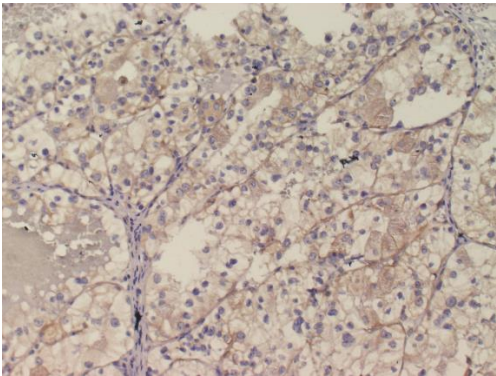

N73

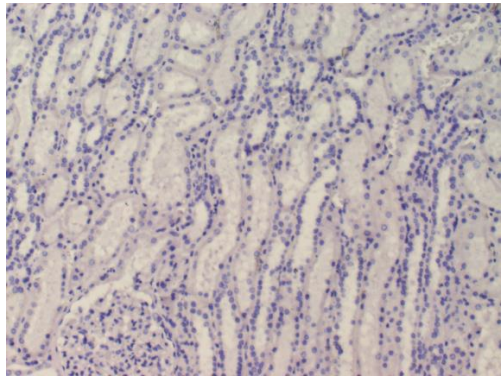

T74

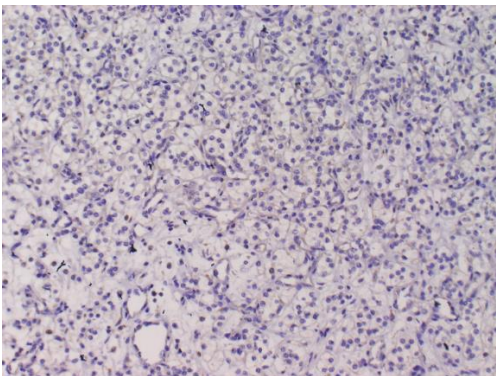

N74

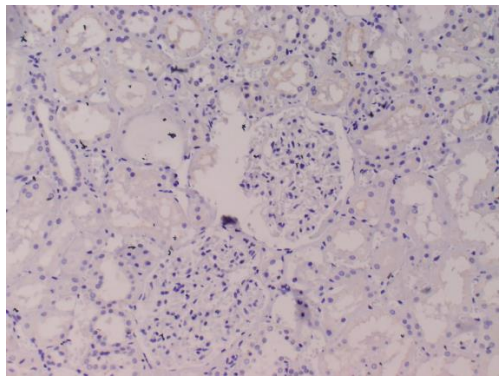

T75

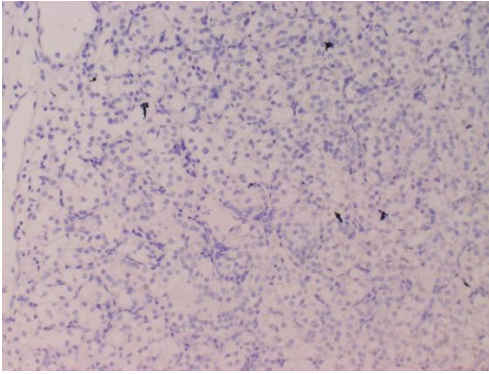

N75

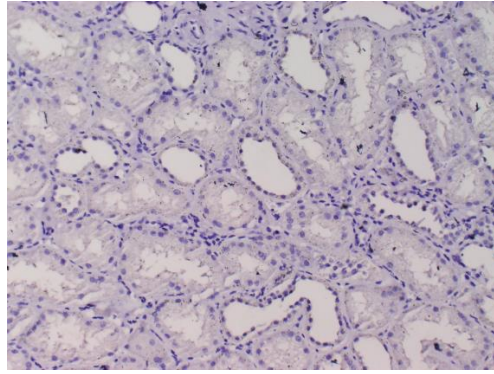

T76

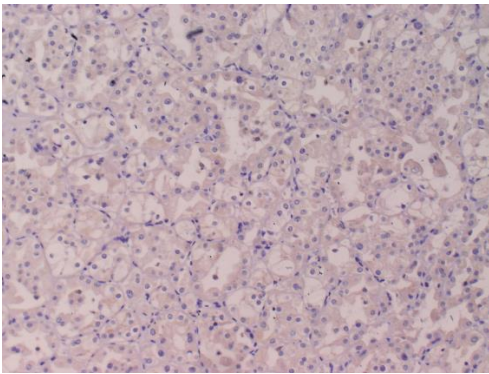

N76

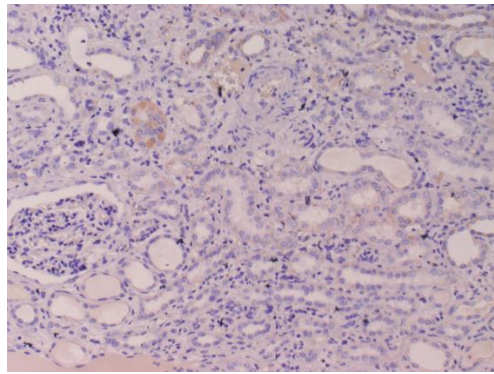

T77

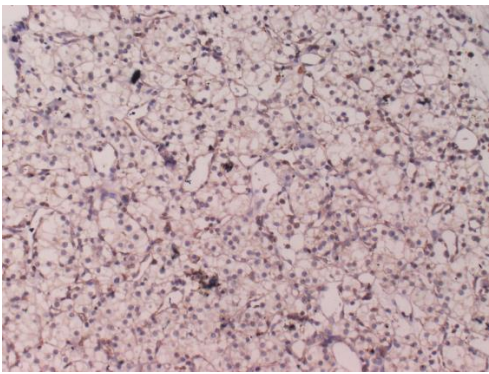

N77

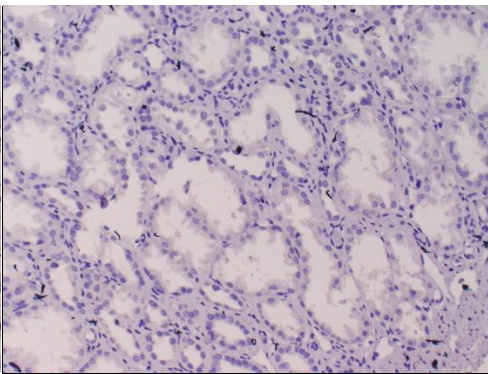

T78

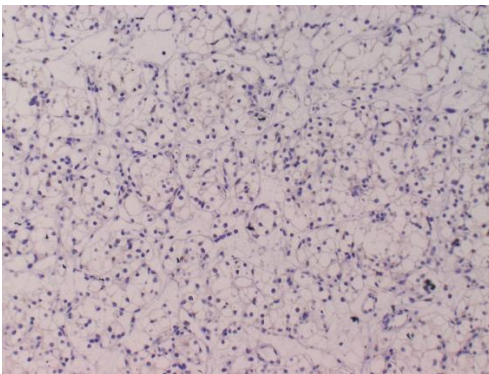

N78

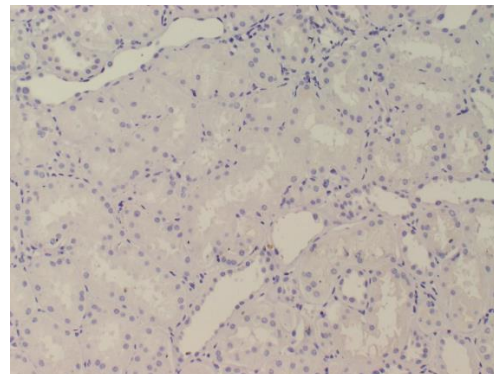

T79

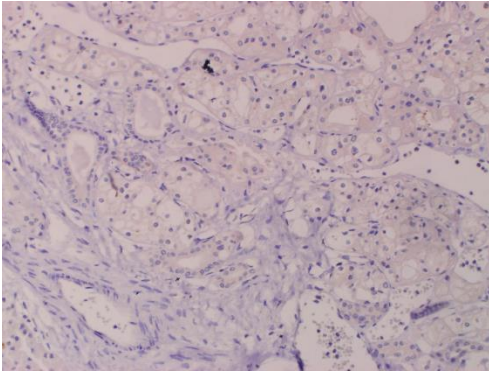

N79

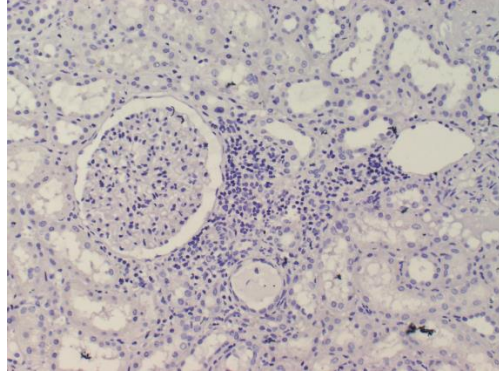

T80

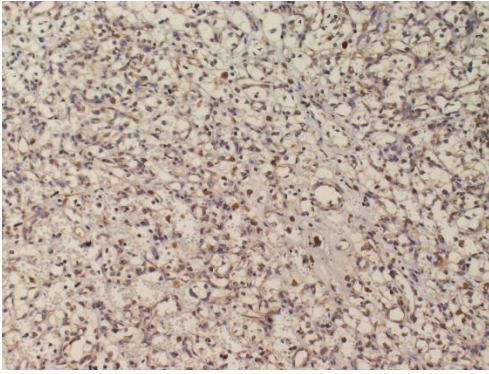

N80

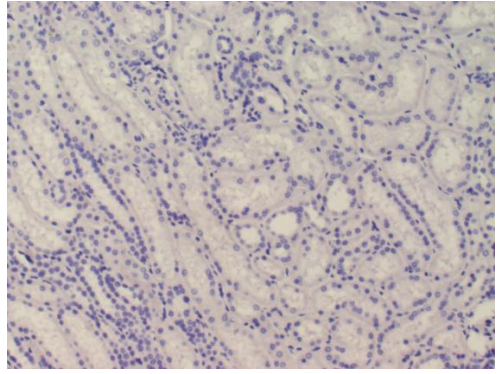

T81

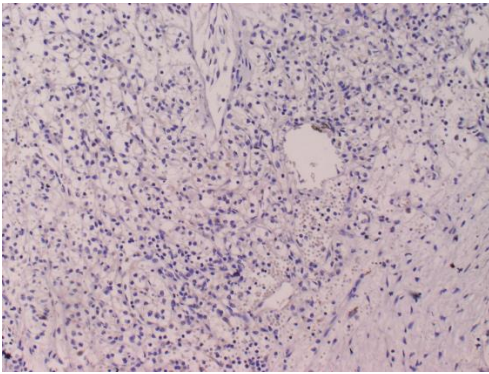

N81

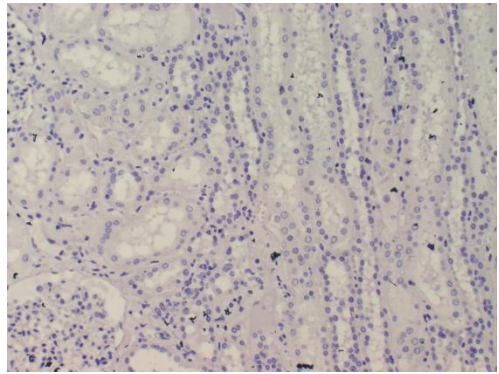

T82

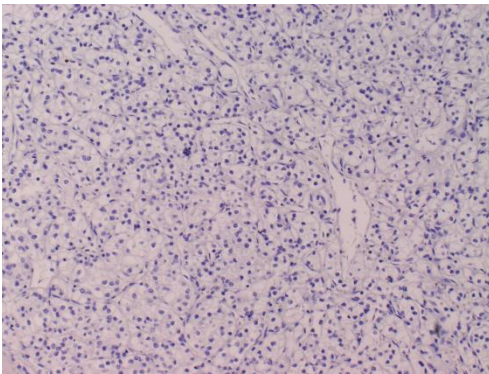

N82

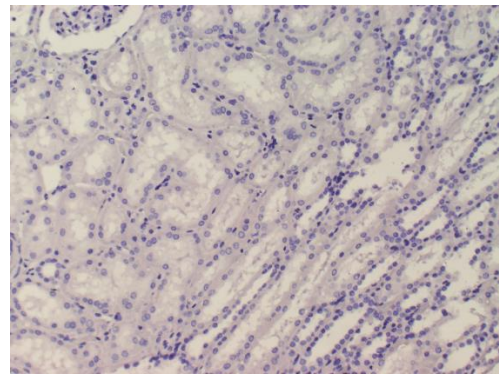

T83

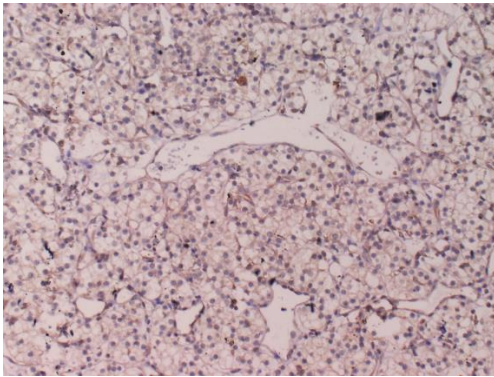

N83

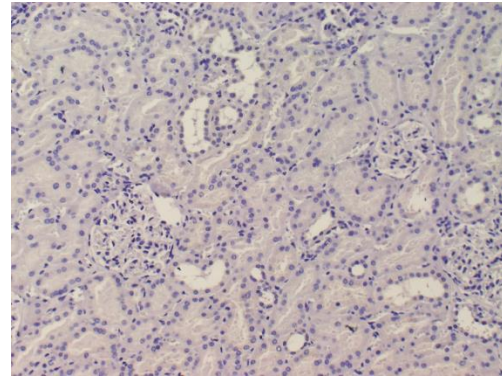

T84

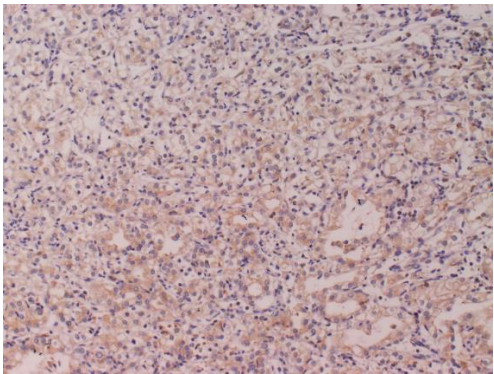

N84

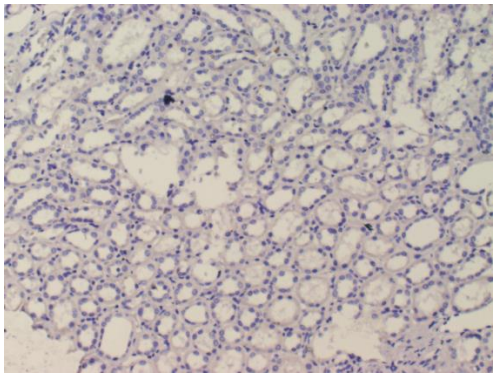

T85

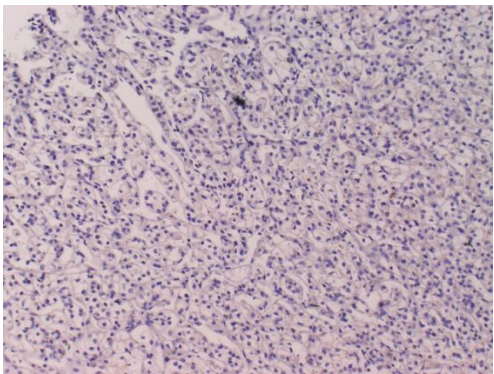

N85

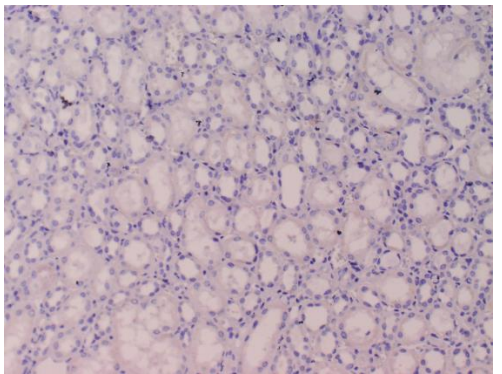

T86

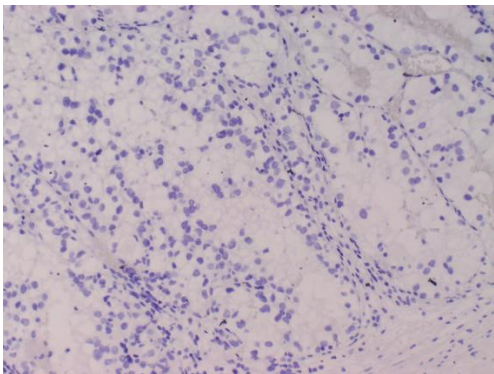

N86

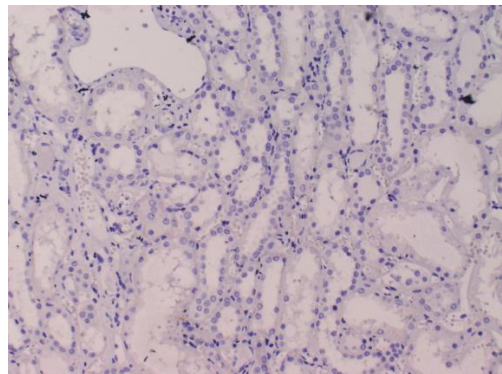

T87

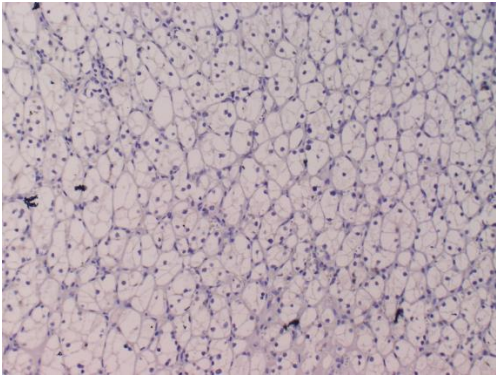

N87

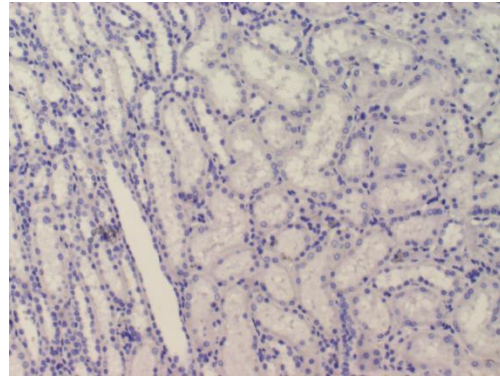

T88

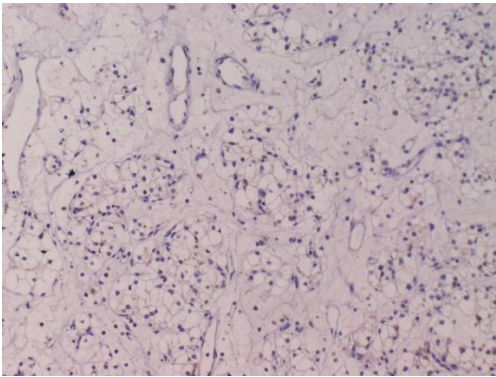

N88

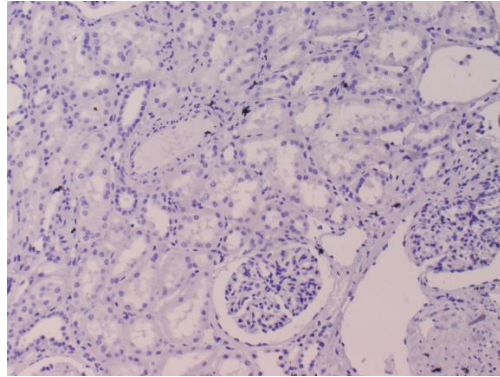

T89

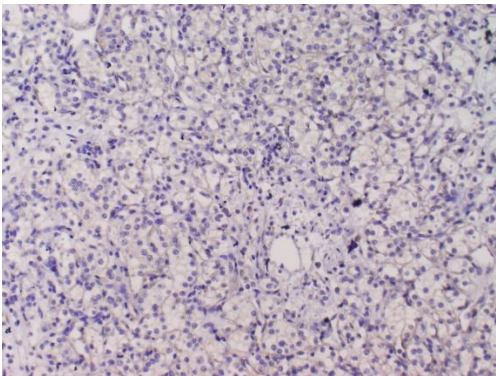

N89

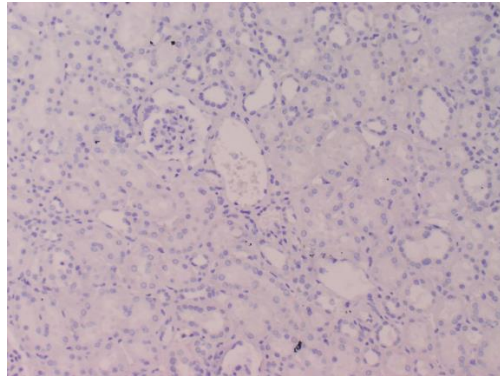

T90

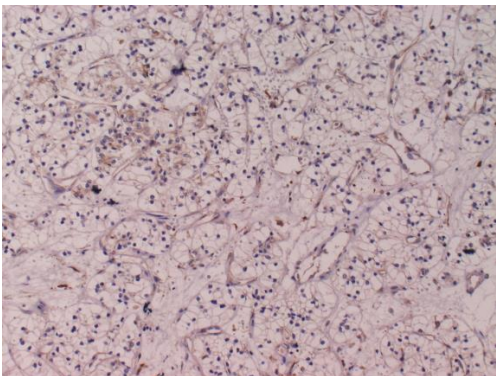

N90

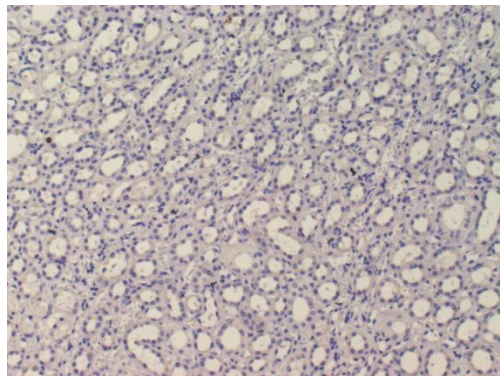

T91

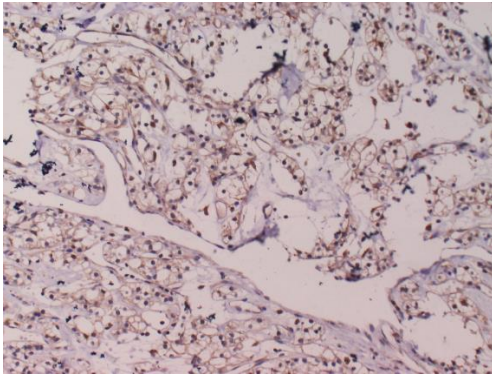

N91

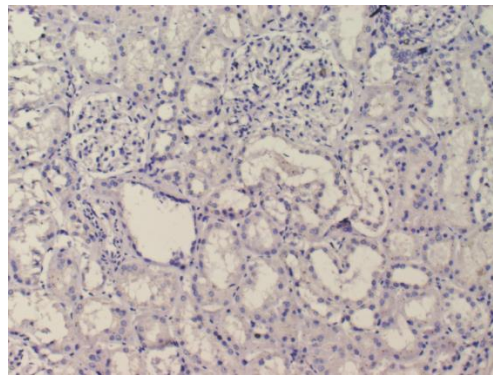

T92

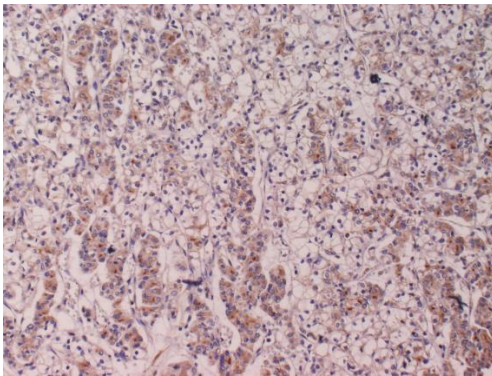

N92

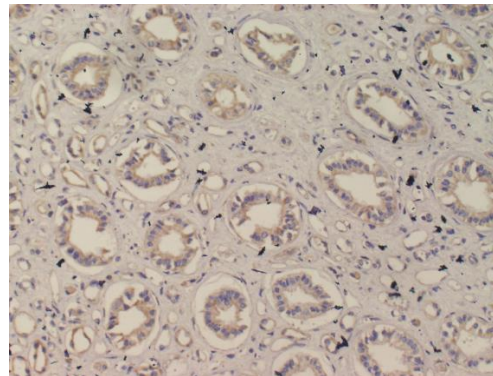

T93

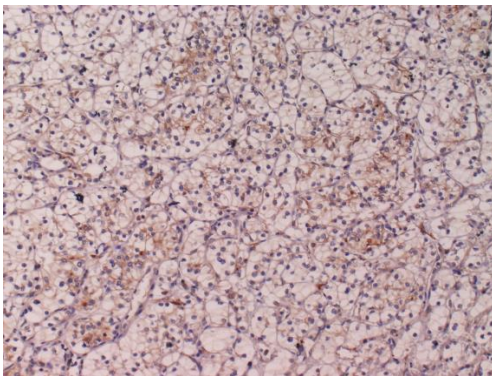

N93

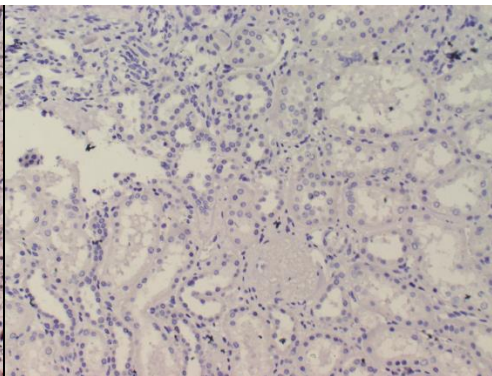

T94

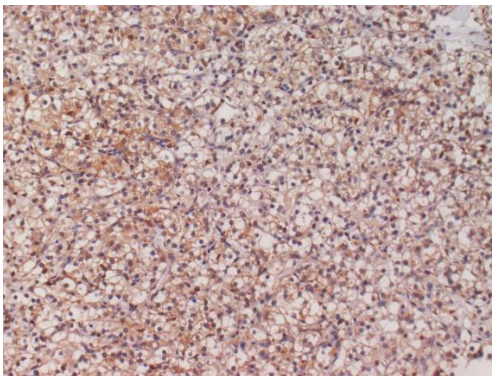

N94

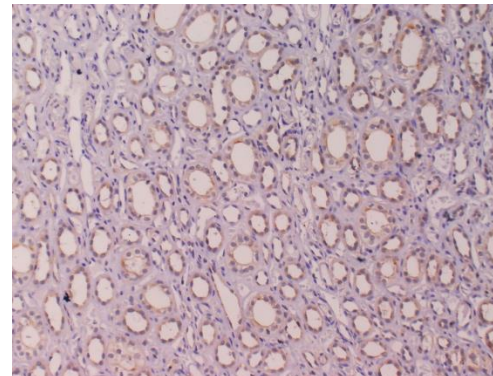



T95

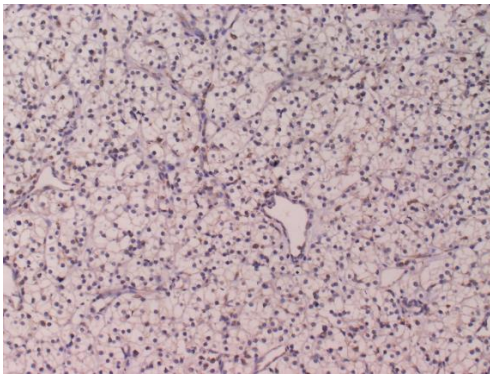

N95

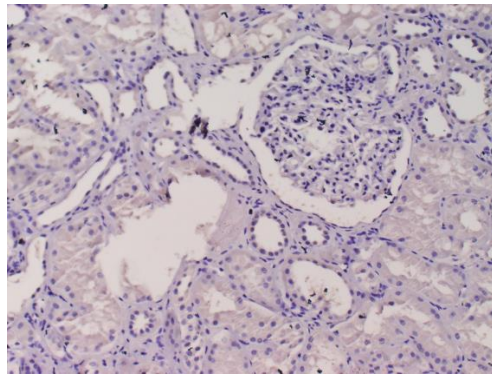

T96

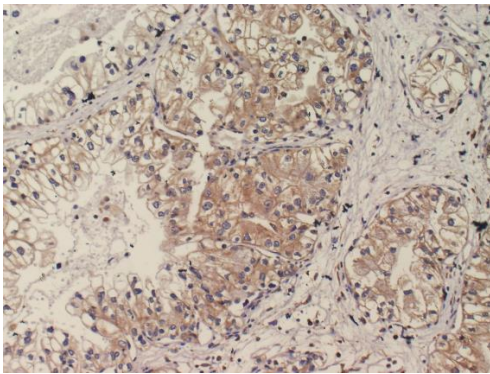

N96

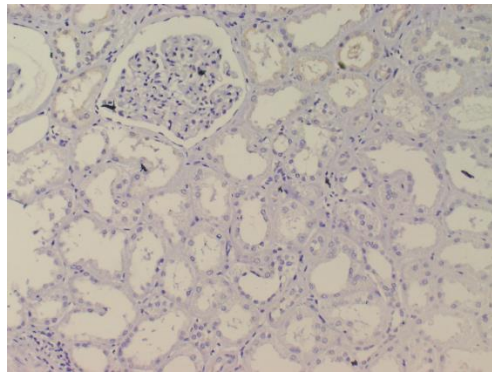

T97

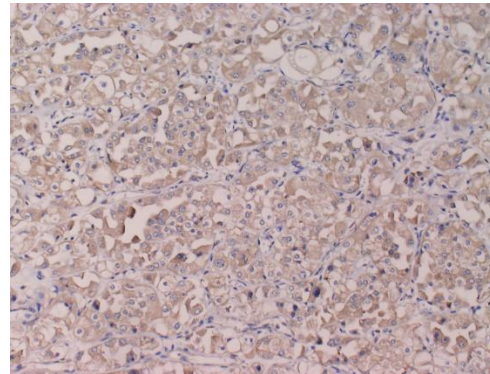

N97

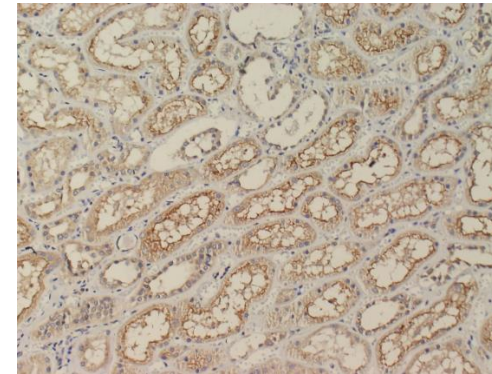

T98

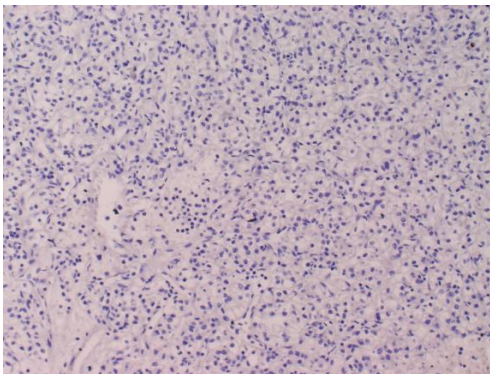

N98

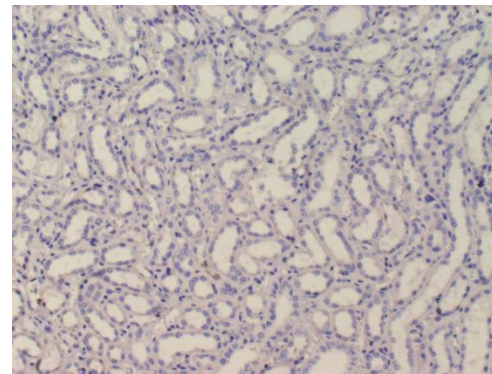

T99

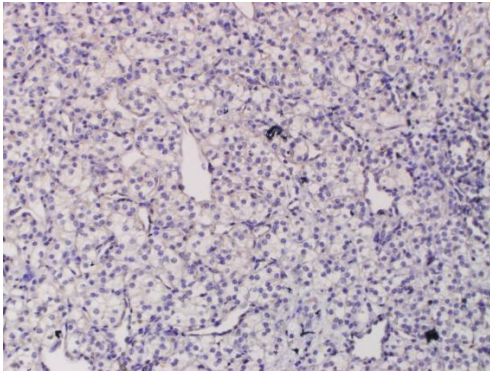

N99

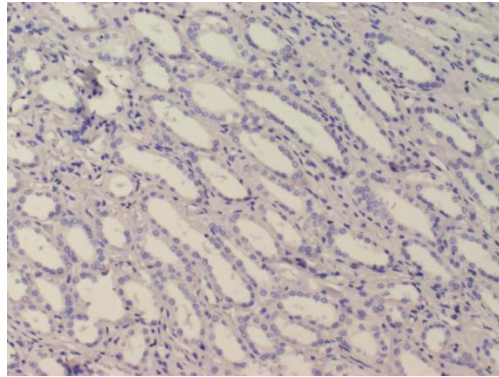

T100

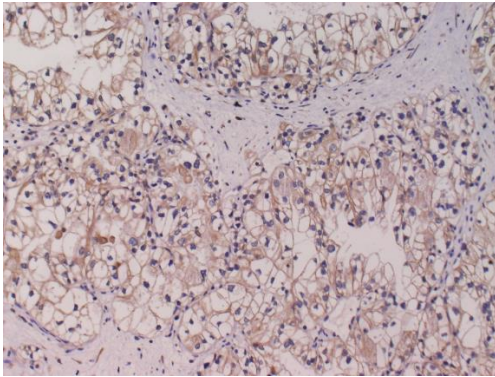

N100

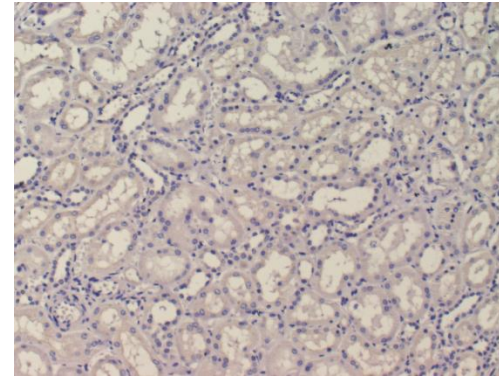

T101

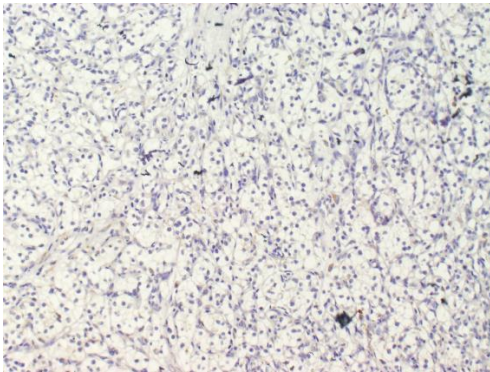

N101

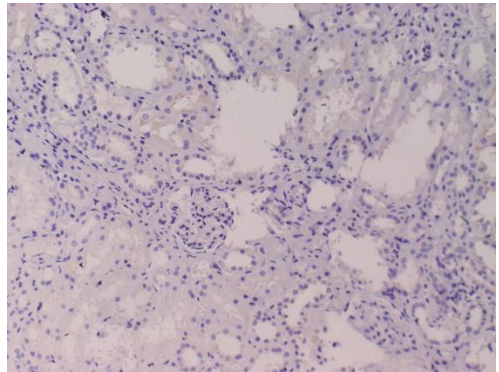

T102

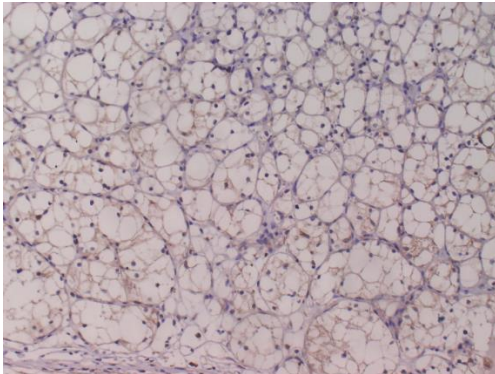

N102

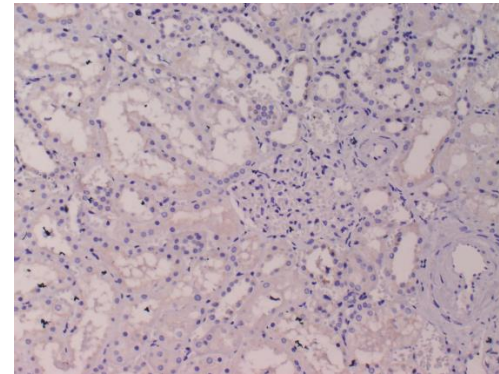

T103

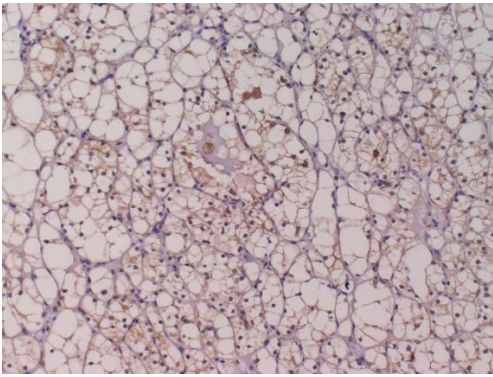

N103

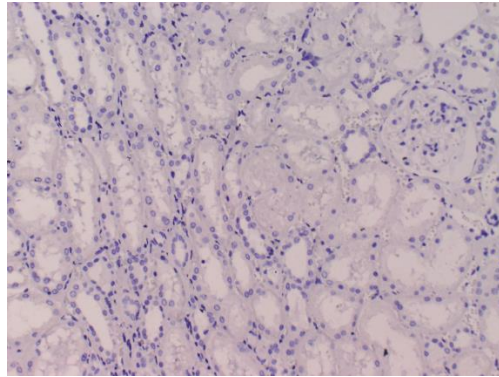

T104

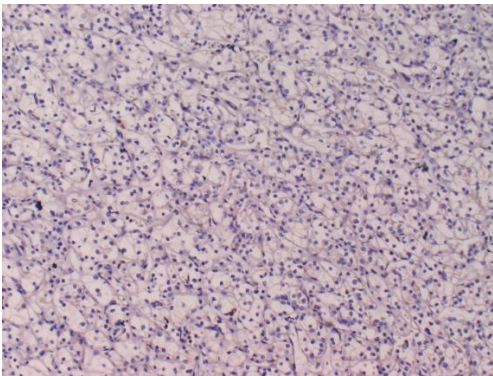

N104

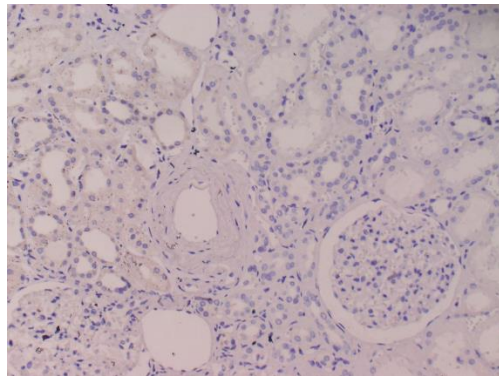

T105

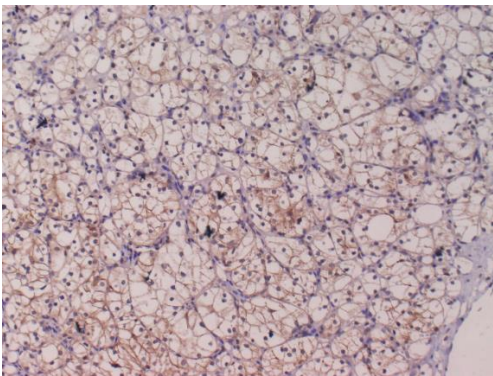

N105

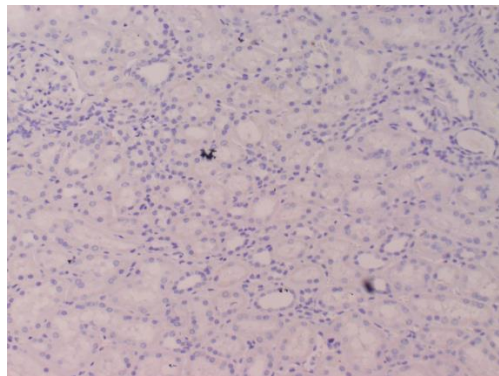

T105

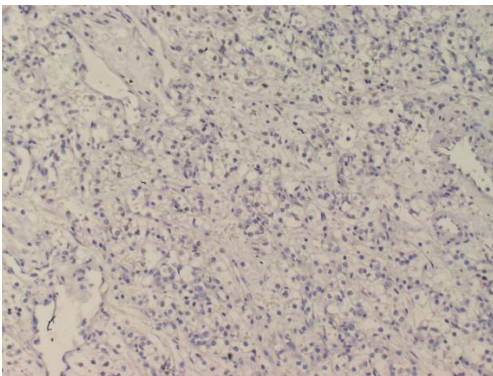

N105

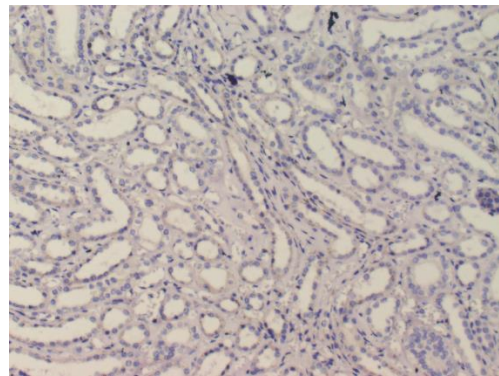

T106

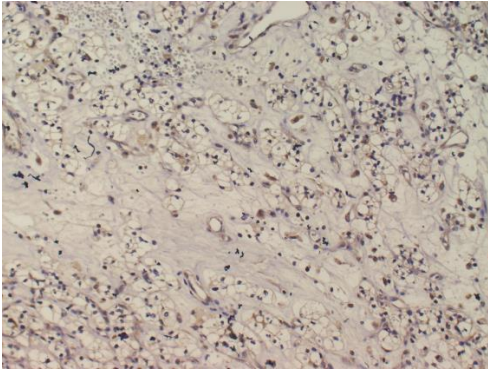

N106

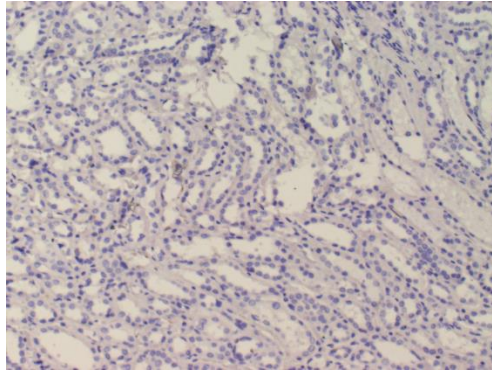

T107

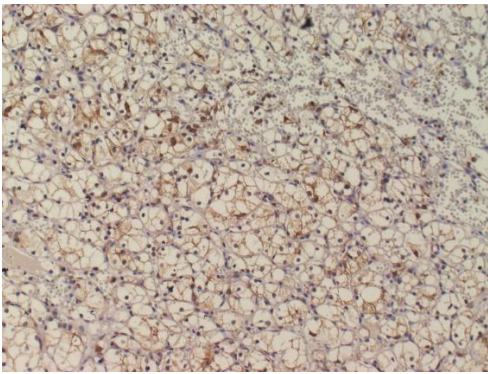

N107

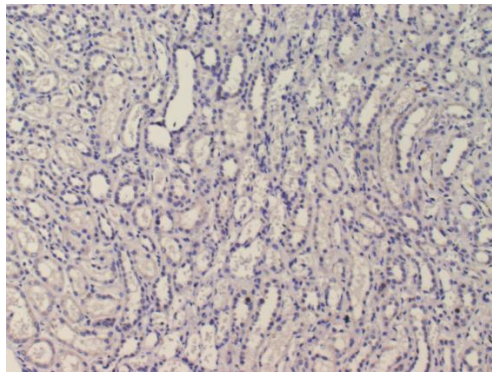

T108

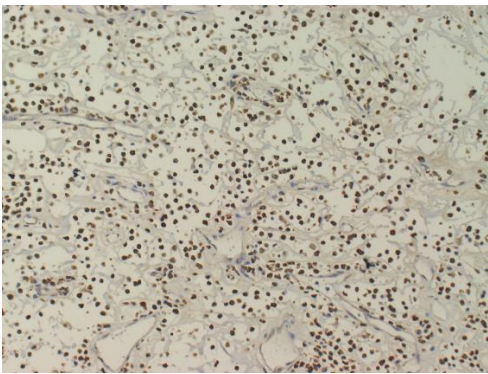

N108

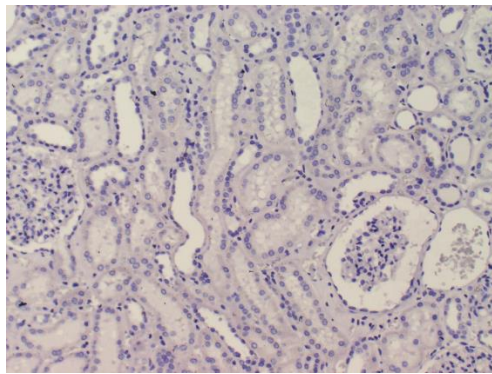

T109

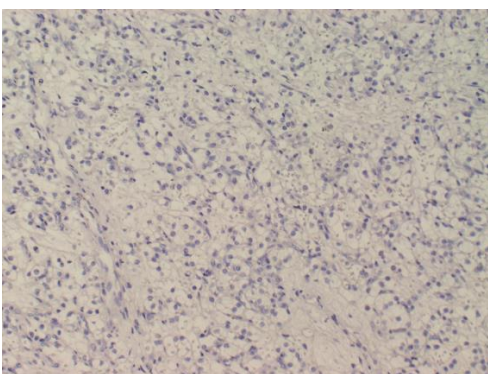

N109

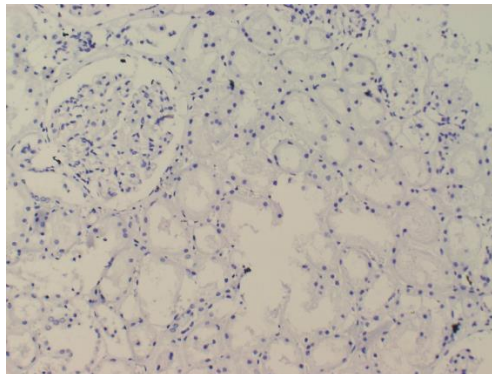

**Supplementary Figure 1B. Effects of MBD2 overexpression or knockdown on the cell cycle of RCC cells measured by flow cytometry.**

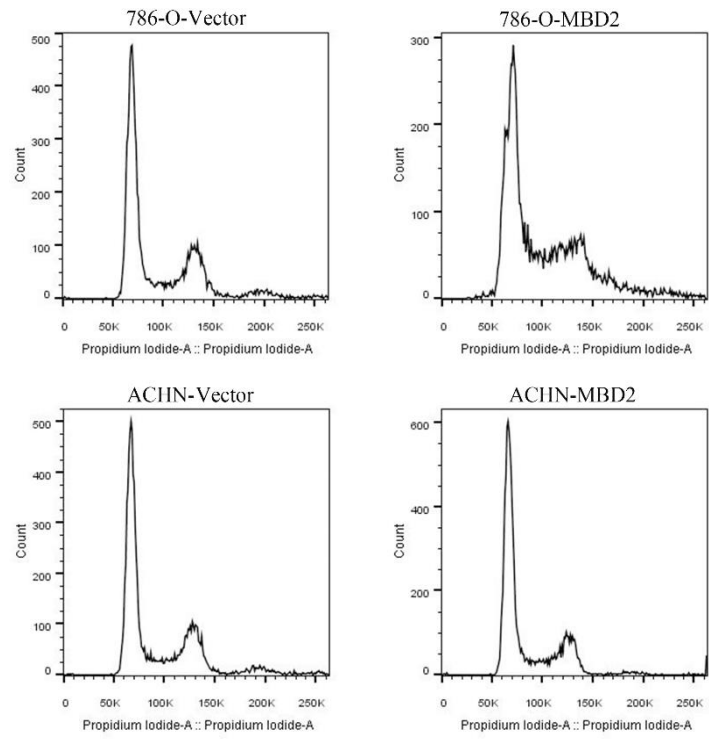

Supplement: Supplementary file 1 [file get_supplementary_file.php]
